# Supplementary material for: Silyl formates as hydrosilane surrogates for the transfer hydrosilylation of ketones
Source: Royal Society of Chemistry journal article supplement (doi:10.1039/d2cc00666a), 2022-01-01
Supplement: d2cc00666a1.pdf [file d2cc00666a1.pdf]

# Supporting Information

## Silyl Formates for the Transfer Hydrosilylation of Ketones

R. Martín Romero, Neethu Thyagarajan, Nora Hellou, Clément Chauvier,  
Timothé Godou, Lucile Anthore-Dalion and Thibault Cantat\*

Université Paris-Saclay, CEA, CNRS, NIMBE,  
91191 Gif-sur-Yvette Cedex (France).

E-mail: [thibault.cantat@cea.fr](mailto:thibault.cantat@cea.fr)

## Table of contents

|     |                                                                               |     |
|-----|-------------------------------------------------------------------------------|-----|
| 1)  | General considerations .....                                                  | S1  |
| 2)  | Optimization of the reaction conditions .....                                 | S2  |
| 3)  | Screening of silyl formates .....                                             | S3  |
| 4)  | General procedures .....                                                      | S4  |
| 5)  | Characterization of isolated and new silyl ethers (scaled up reactions) ..... | S5  |
| 6)  | Evidence for the crucial role of the N-H function .....                       | S9  |
| 7)  | Study of the selectivity between aldehyde and ketone .....                    | S10 |
| 8)  | TESOCDO synthesis .....                                                       | S11 |
| 9)  | Deuterium labelling experiment .....                                          | S14 |
| 10) | Experimental evidence of ruthenium monohydride species .....                  | S15 |
| 11) | Competition reactions .....                                                   | S16 |
| 12) | NMR spectra of isolated compounds .....                                       | S17 |
| 13) | References .....                                                              | S31 |

## 1. General considerations

Unless otherwise stated, all reactions were performed in a recirculating *mBraun LabMaster DP* inert atmosphere (Ar) drybox and vacuum Schlenk lines. Glassware were dried overnight at 120 °C. NMR spectra were recorded in a *Bruker Avance Neo 400 MHz* spectrometer. Chemical shifts were reported as ppm downfield from residual solvent peaks. The following calibrations were used: CDCl<sub>3</sub>  $\delta$  = 7.26 and 77.16 ppm, THF-*d*<sub>8</sub>  $\delta$  = 3.58, 1.72 and 67.21, 25.31 ppm, C<sub>6</sub>D<sub>6</sub>  $\delta$  = 7.16 and 128.06 ppm, CD<sub>2</sub>Cl<sub>2</sub>  $\delta$  = 5.32 and 53.84 ppm. HRMS experiments were performed on a Bruker maXis within the service centre at Institute of Organic and Analytic Chemistry, University of Orléans. 4Å molecular sieves (Aldrich) were dried under dynamic vacuum at 250 °C for 48 h prior to use. Deuterated solvents were dried and stored under molecular sieves. Toluene was dried with sodium benzophenone, distilled and stored under molecular sieves. [Ru( $\kappa^1$ -OAc)( $\kappa^2$ -OAc)( $\kappa^3$ -triphos)] (**1**), *fac*-[Ru( $\kappa^1$ -OAc)( $\kappa^2$ -OAc)( $\kappa^3$ -PN<sup>H</sup>P<sup>Ph</sup>)] (**2**)<sup>[1]</sup>, *fac*-[Ru( $\kappa^1$ -OAc)( $\kappa^2$ -OAc)( $\kappa^3$ -PN<sup>Me</sup>P<sup>Ph</sup>)] (**2-Me**)<sup>[2]</sup>, silyl formates<sup>[3]</sup> were synthesized according to literature procedures. Ketones were purchased and used without any further purification.

## 2. Optimization of the reaction conditions

In a glovebox, a *J. Young* NMR Tube was charged with the catalyst (x mol%), C<sub>6</sub>D<sub>6</sub> (0.4 mL), acetophenone **3a** (0.1 mmol, 1.0 equiv.), mesitylene (10 μL) and the triethylsilylformate (1.4 equiv.). The tube was sealed, brought out of the glovebox and heated. The reaction progress was monitored by <sup>1</sup>H NMR spectroscopy. Yields were determined by <sup>1</sup>H NMR integration versus mesitylene as an internal standard.

**Table S1.** Screening of conditions. 0.1 mmol scale

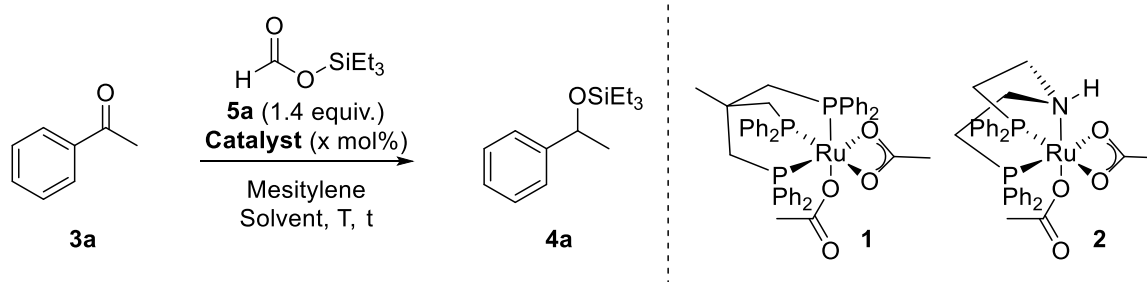

| Entry | Catalyst (mol%) | Solvent                         | T (°C) | t (h) | Yield (%) |
|-------|-----------------|---------------------------------|--------|-------|-----------|
| 1     | <b>1</b> (3)    | CD <sub>3</sub> CN              | 90     | 24    | 0         |
| 2     | <b>2</b> (3)    | CD <sub>3</sub> CN              | 90     | 11    | 78        |
| 3     | <b>2</b> (3)    | <i>d8</i> -THF                  | 90     | 2.5   | 99        |
| 4     | <b>2</b> (3)    | CD <sub>2</sub> Cl <sub>2</sub> | 90     | 22    | 0         |
| 5     | <b>2</b> (3)    | <i>d8</i> -Toluene              | 90     | 2.5   | 92        |
| 6     | <b>2</b> (3)    | C <sub>6</sub> D <sub>6</sub>   | 90     | 1.5   | 99        |
| 7     | <b>2</b> (3)    | EtOAc                           | 90     | 3     | 97        |
| 8     | <b>2</b> (3)    | Anisole                         | 90     | 9     | 77        |
| 9     | <b>2</b> (1.5)  | C <sub>6</sub> D <sub>6</sub>   | 90     | 37    | 79        |
| 10    | <b>2</b> (3)    | C <sub>6</sub> D <sub>6</sub>   | 70     | 4     | 99        |
| 11    | <b>2</b> (3)    | C <sub>6</sub> D <sub>6</sub>   | 50     | 36    | 99        |

### 3. Screening of silyl formates

In a glovebox, a *J. Young* NMR Tube was charged with *fac*-[Ru( $\kappa^1$ -OAc)( $\kappa^2$ -OAc)( $\kappa^3$ -PN<sup>H</sup>P<sup>Ph</sup>)] (**2**) (3 mol%), C<sub>6</sub>D<sub>6</sub> (0.4 mL), acetophenone **3a** (0.1 mmol, 1.0 equiv.), mesitylene (10  $\mu$ L) and the trialkylsilylformate (1.4 equiv.). The tube was sealed, brought out of the glovebox and heated. The reaction progress was monitored by <sup>1</sup>H NMR spectroscopy. Yields were determined by <sup>1</sup>H NMR integration versus mesitylene as an internal standard.

**Table S2.** Screening of silylformates. 0.1 mmol scale

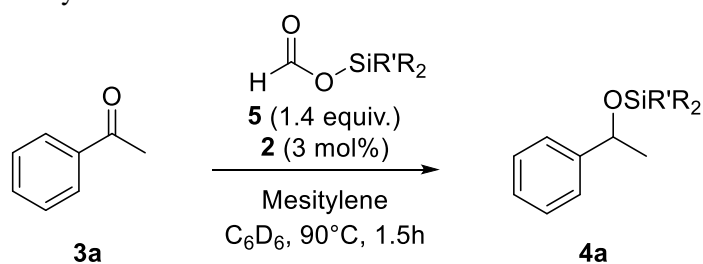

| Entry | R'          | R           | Yield (%) |
|-------|-------------|-------------|-----------|
| 1     | Et          | Et          | 99        |
| 2     | Me          | Me          | 93        |
| 3     | Ph          | Me          | 98        |
| 4     | Me          | Ph          | 71        |
| 5     | <i>t</i> Bu | Me          | 0         |
| 6     | <i>i</i> Pr | <i>i</i> Pr | 0         |
| 7     | OEt         | OEt         | 38        |

## 4. General procedures

### 4.1. General Procedure for NMR Scale reactions (GP1)

In a glovebox, a *J. Young* NMR Tube was charged with *fac*-[Ru( $\kappa^1$ -OAc)( $\kappa^2$ -OAc)( $\kappa^3$ -PN<sup>H</sup>P<sup>Ph</sup>)] (**2**) (3 mol%), C<sub>6</sub>D<sub>6</sub> (0.4 mL), ketone (0.1 mmol, 1.0 equiv.), mesitylene (10  $\mu$ L) and the appropriate silyl formate (1.4 – 2.0 equiv.). The tube was sealed, brought out of the glovebox and heated at 90 °C. The reaction progress was monitored by <sup>1</sup>H NMR spectroscopy. Yields of silylethers were determined by <sup>1</sup>H NMR integration versus mesitylene as an internal standard ( $\delta_{\text{H}} = 6.71$  and 2.15 ppm in C<sub>6</sub>D<sub>6</sub>).

Representative NMR spectra for the transfer hydrosilylation of acetophenone (**3a**) with Et<sub>3</sub>SiOCHO (**5a**) is given in Figures S1.

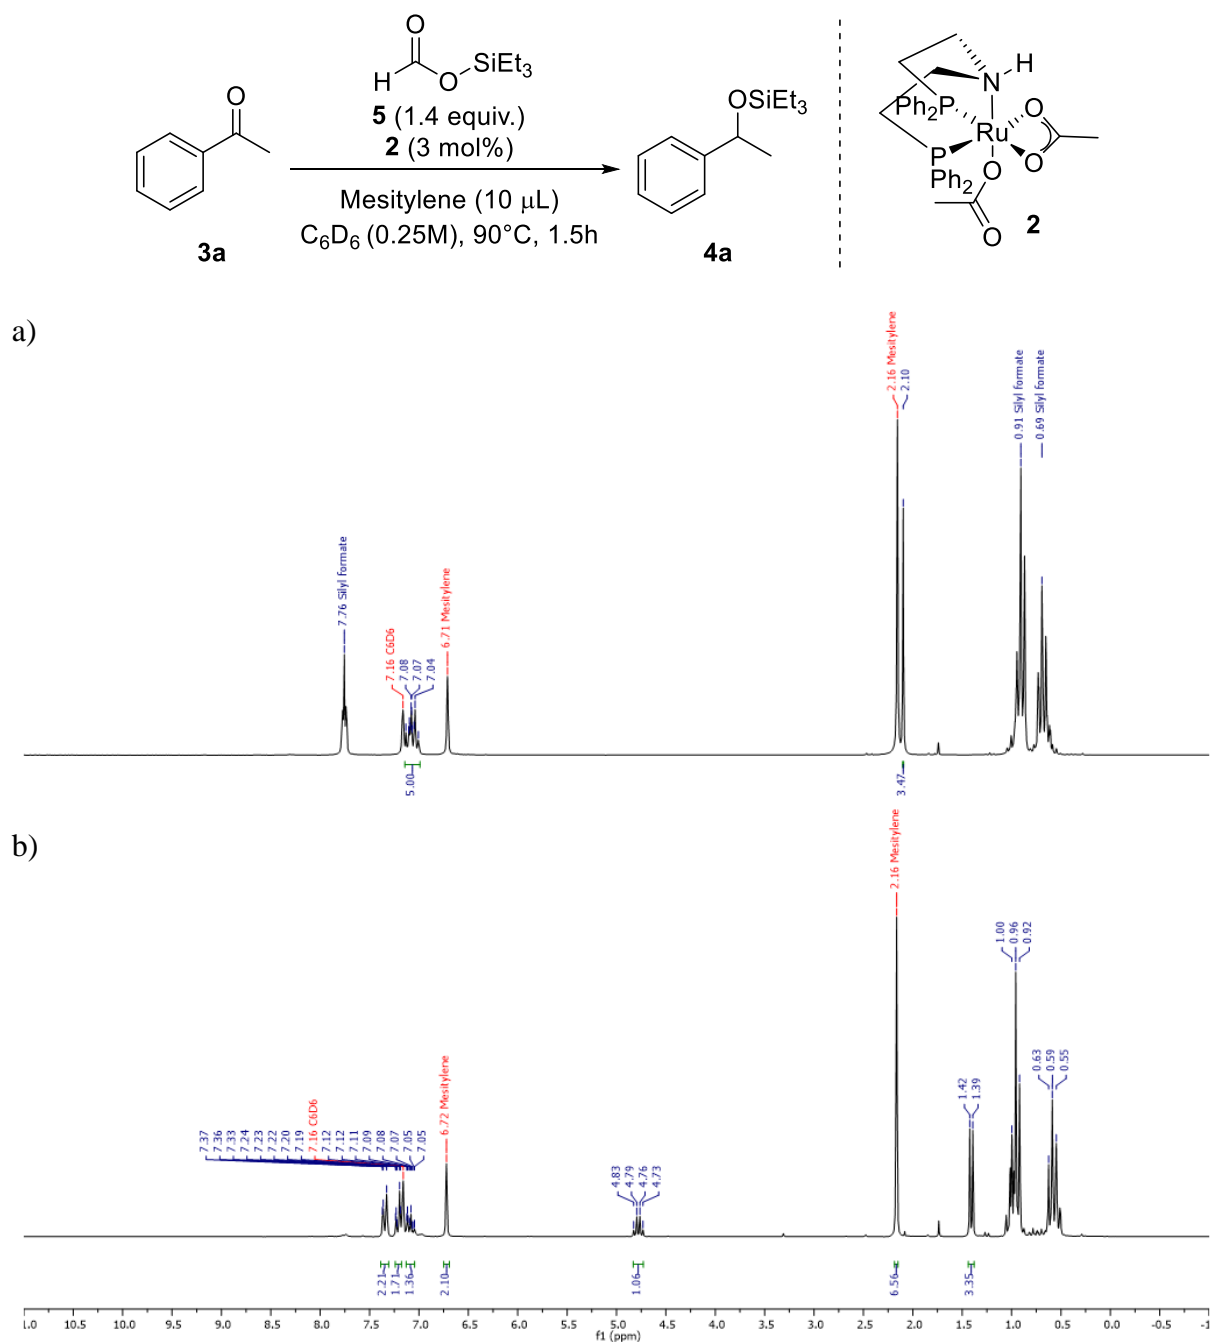

**Figure S1.** Representative  $^1\text{H}$  NMR spectra obtained in  $\text{C}_6\text{D}_6$  for the transfer hydrosilylation of acetophenone (**3a**) (0.1 mmol) with  $\text{Et}_3\text{SiCHO}$  (**5a**). a) Crude reaction mixture before heating;  $t = 0$ . b) Crude mixture after heating 1.5 h at  $90^\circ\text{C}$ .

The formation of known silyl ethers **4c**,<sup>[4]</sup> **4d**,<sup>[5]</sup> **4g**,<sup>[6]</sup> **4i**,<sup>[7]</sup> **4j**,<sup>[8]</sup> **4la**,<sup>[9]</sup> **4lb**,<sup>[10]</sup> **4m**,<sup>[7]</sup> **4n**,<sup>[7]</sup> **4t**,<sup>[7]</sup> **4u**,<sup>[7]</sup> **4v**,<sup>[11]</sup> was confirmed by  $^1\text{H}$  NMR and/or  $^{13}\text{C}$  NMR analysis, with spectroscopic data in accordance with literature.

#### 4.2. General Procedure for preparative scale up reactions (GP2)

In a flamed and dried Schlenk tube, *fac*- $[\text{Ru}(\kappa^1\text{-OAc})(\kappa^2\text{-OAc})(\kappa^3\text{-PN}^{\text{H}}\text{P}^{\text{Ph}})]$  (**2**) (3 mol%), Toluene (2 mL), ketone (0.5 mmol, 1.0 equiv.) and the appropriate silyl formate (1.4 – 2.0 equiv.) were added. The Schlenk tube was sealed, and heated at  $90^\circ\text{C}$ . After reaction completion, the solvent was removed under reduced pressure. The final crude product was purified by chromatography (silica-gel, cyclohexane/ethyl acetate or petroleum ether/Ethyl acetate mixtures).

### 5. Characterization of isolated and new silyl ethers (scaled up reactions)

#### (1-(*p*-Tolyl)ethoxy)triethylsilane (**4b**)

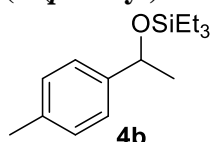

Isolated as a colorless oil in 90% yield (procedure GP2). Spectroscopic data in accordance with literature.<sup>[5]</sup>

$^1\text{H}$  NMR (200 MHz,  $d_8$ -THF):  $\delta = 7.21$  (d,  $J = 7.9$  Hz, 2H),  $7.07$  (d,  $J = 7.9$  Hz, 2H),  $4.86$  (q,  $J = 6.3$  Hz, 1H),  $2.28$  (s, 3H),  $1.36$  (d,  $J = 6.3$  Hz, 3H),  $0.91$  (t,  $J = 7.8$  Hz, 9H),  $0.63$ - $0.48$  (m, 6H).

$^{13}\text{C}$  NMR (50 MHz,  $d_8$ -THF):  $\delta = 144.8$ ,  $136.6$ ,  $129.2$ ,  $125.7$ ,  $71.2$ ,  $27.7$ ,  $21.0$ ,  $7.0$ ,  $5.4$ .

#### (1-(*p*-Iodophenyl)ethoxy)triethylsilane (**4e**)

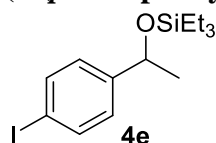

Isolated as a colorless oil in 86% yield (procedure GP2).

$^1\text{H}$  NMR (400 MHz,  $\text{CDCl}_3$ ):  $\delta = 7.63$  (d,  $J = 8.4$  Hz, 2H),  $7.09$  (d,  $J = 8.2$  Hz, 2H),  $4.80$  (q,  $J = 6.3$  Hz, 1H),  $1.38$  (d,  $J = 6.3$  Hz, 3H),  $0.91$  (t,  $J = 7.9$  Hz, 9H),  $0.61$ - $0.52$  (m, 6H).

$^{13}\text{C}$  NMR (100 MHz,  $\text{CDCl}_3$ ):  $\delta = 146.8$ ,  $137.3$ ,  $127.4$ ,  $92.1$ ,  $70.2$ ,  $27.3$ ,  $6.9$ ,  $4.9$ .

HRMS (ESI+) ( $m/z$ ):  $[\text{M} - \text{H}]^+$  calcd. for  $\text{C}_{14}\text{H}_{22}\text{IOSi}$ , 361.0479; found: 361.0481

#### Methyl 4-(1-((triethylsilyl)oxy)ethyl)benzoate (**4f**)

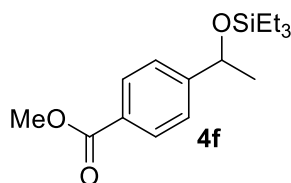

Isolated as a colorless oil in 85% yield (procedure GP2).

**<sup>1</sup>H NMR (400 MHz, CDCl<sub>3</sub>):**  $\delta$  = 7.99 (d,  $J$  = 8.3 Hz, 2H), 7.41 (d,  $J$  = 8.3 Hz, 2H), 4.90 (q,  $J$  = 6.4 Hz, 1H), 3.90 (s, 3H), 1.42 (d,  $J$  = 6.3 Hz, 3H), 0.91 (t,  $J$  = 8.0 Hz, 9H), 0.62-0.51 (m, 6H).

**<sup>13</sup>C NMR (100 MHz, CDCl<sub>3</sub>):**  $\delta$  = 167.3, 152.3, 129.7, 128.8, 125.3, 70.4, 52.1, 27.2, 6.9, 4.9.

**HRMS (ESI+)** ( $m/z$ ): [M + H]<sup>+</sup> calcd. for C<sub>16</sub>H<sub>27</sub>O<sub>3</sub>Si, 295.1724; found: 295.1725.

**(1-(*p*-Nitrophenyl)ethoxy)triethylsilane (4h)**

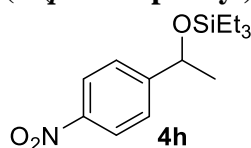

Isolated as a colorless oil in 95% yield (procedure GP2). Spectroscopic data in accordance with literature.<sup>[12]</sup>

**<sup>1</sup>H NMR (200 MHz, *d*<sub>8</sub>-THF):**  $\delta$  = 8.18 (d,  $J$  = 8.8 Hz, 2H), 7.60 (d,  $J$  = 8.8 Hz, 2H), 5.06 (q,  $J$  = 6.3 Hz, 1H), 1.42 (d,  $J$  = 6.4 Hz, 3H), 0.94 (t,  $J$  = 7.8 Hz, 9H), 0.70-0.52 (m, 6H).

**<sup>13</sup>C NMR (50 MHz, *d*<sub>8</sub>-THF):**  $\delta$  = 155.1, 147.9, 126.8, 124.0, 70.6, 27.2, 6.9, 5.2.

**(1-(Phenyl)butoxy)triethylsilane (4k)**

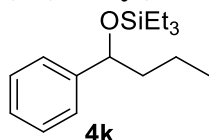

Isolated as a colorless oil in 80% yield (procedure GP2).

**<sup>1</sup>H NMR (200 MHz, C<sub>6</sub>D<sub>6</sub>):**  $\delta$  = 7.36-7.28 (m, 2H), 7.24-7.06 (m, 3H), 4.63 (dd,  $J$  = 7.2, 5.1 Hz, 1H), 1.90-1.20 (m, 4H), 1.01-0.79 (m, 12H), 0.65-0.48 (m, 6H).

**<sup>13</sup>C NMR (50 MHz, C<sub>6</sub>D<sub>6</sub>):**  $\delta$  = 146.3, 128.4, 127.3, 126.3, 75.3, 43.7, 19.3, 14.3, 7.1, 5.3.

**HRMS (ESI+)** ( $m/z$ ): [M - H]<sup>+</sup> calcd. for C<sub>16</sub>H<sub>27</sub>OSi, 263.1826; found: 263.1827 (Data of the oxidized product).

**(di-*p*-Tolylmethoxy)triethylsilane (4ma)**

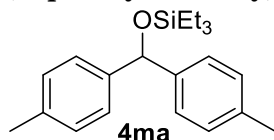

Isolated as a white solid in 80% yield (procedure GP2).

**<sup>1</sup>H NMR (200 MHz, *d*<sub>8</sub>-THF)**  $\delta$  = 7.23 (d,  $J$  = 7.6 Hz, 4H), 7.04 (d,  $J$  = 7.6 Hz, 4H), 5.75 (s, 1H), 2.26 (s, 6H), 0.89z (t,  $J$  = 7.5 Hz, 9H), 0.70 – 0.43 (m, 6H).

**<sup>13</sup>C NMR (50 MHz, *d*<sub>8</sub>-THF)**  $\delta$  = 143.5, 136.7, 129.2, 126.8, 76.9, 20.9, 7.0, 5.4.

**HRMS (ESI+)** ( $m/z$ ): [M + Na]<sup>+</sup> calcd. for C<sub>21</sub>H<sub>30</sub>NaOSi, 349.1958; found: 349.1962.



**(di-*p*-Tolylmethoxy)triethylsilane (4mb)**

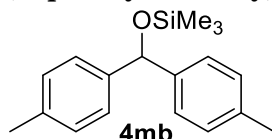

Isolated as a colorless oil in 70% yield (procedure GP2).

**<sup>1</sup>H NMR (200 MHz, CD<sub>2</sub>Cl<sub>2</sub>)**  $\delta$  = 7.20 (d, *J* = 7.7 Hz, 4H), 7.10 (d, *J* = 7.7 Hz, 4H), 5.71 (s, 1H), 2.30 (s, 6H), 0.07 (s, 9H).

**<sup>13</sup>C NMR (50 MHz, CD<sub>2</sub>Cl<sub>2</sub>)**  $\delta$  = 142.7, 137.0, 129.1, 126.6, 76.4, 21.1, 0.1.

**HRMS (ESI+)** (*m/z*): [M + Na]<sup>+</sup> calcd. for C<sub>18</sub>H<sub>24</sub>NaOSi, 307.1489; found: 307.1491.

**[(*p*-Nitrophenyl)(Phenyl)methoxy]triethylsilane (4oa)**

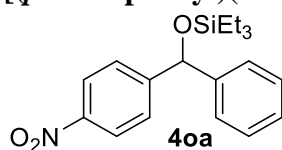

Isolated as a colorless oil in 95% yield (procedure GP2).

**<sup>1</sup>H NMR (200 MHz, *d*<sub>8</sub>-THF)**  $\delta$  = 8.15 (d, *J* = 8.9 Hz, 2H), 7.65 (d, *J* = 8.9 Hz, 2H), 7.47-7.36 (m, 2H), 7.34-7.17 (m, 3H), 5.96 (s, 1H), 0.89 (t, *J* = 7.7 Hz, 9H), 0.71-0.53 (m, 6H).

**<sup>13</sup>C NMR (50 MHz, *d*<sub>8</sub>-THF)**  $\delta$  = 153.4, 147.9, 144.9, 129.0, 128.1, 127.5, 127.0, 124.0, 76.4, 6.9, 5.2.

**HRMS (ESI+)** (*m/z*): [M + H]<sup>+</sup> calcd. for C<sub>19</sub>H<sub>26</sub>NO<sub>3</sub>Si, 344.1676; found: 344.1675.

**Dimethyl[(4-nitrophenyl)(phenyl)methoxy](phenyl)silane (4oc)**

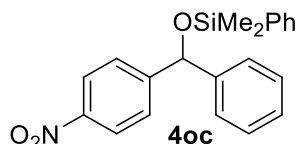

Isolated as a white solid in 63% yield (procedure GP2 with Anisole as solvent).

**<sup>1</sup>H NMR (400 MHz, CDCl<sub>3</sub>)**  $\delta$  = 8.16 (d, *J* = 8.8 Hz, 2H), 7.57 – 7.48 (m, 4H), 7.47 – 7.40 (m, 1H), 7.40 – 7.24 (m, 7H), 5.80 (s, 1H), 0.35 (d, *J* = 5.0 Hz, 6H).

**<sup>13</sup>C NMR (101 MHz, CDCl<sub>3</sub>)**  $\delta$  = 152.0, 147.0, 143.2, 136.9, 133.5, 129.9, 128.6, 127.9, 127.8, 127.0, 126.6, 123.6, 76.2, -1.1, -1.4.

**[1-Methyl-3-phenyl-(*E*)-allyloxy]triethylsilane (4q)**

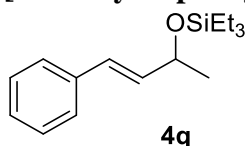

Isolated as a colorless oil in 78% yield (procedure GP2). Spectroscopic data in accordance with literature.<sup>[12]</sup>

**<sup>1</sup>H NMR (400 MHz, CDCl<sub>3</sub>)**:  $\delta$  = 7.39-7.35 (m, 2H), 7.28-7.34 (m, 2H), 7.25-7.17 (m, 1H), 6.51 (d, *J* = 15.9 Hz, 1H), 6.22 (ddd, *J* = 15.9, 5.9, 1.0 Hz, 1H), 4.47 (p, *J* = 6.3 Hz, 1H), 1.32 (d, *J* = 6.3 Hz, 3H), 0.98 (t, *J* = 7.9 Hz, 9H), 0.67-0.60 (m, 6H).

**<sup>13</sup>C NMR (100 MHz, CDCl<sub>3</sub>):**  $\delta = 137.3, 134.6, 128.7, 128.2, 127.4, 126.5, 69.3, 24.9, 7.0, 5.0.$

**HRMS (ESI+)** (*m/z*): [M - H]<sup>+</sup> calcd. for C<sub>16</sub>H<sub>25</sub>OSi, 261.1669; found: 261.1669.

**[(1-Methyl-3-phenyl-2propynyl)oxy]triethylsilane (4r)**

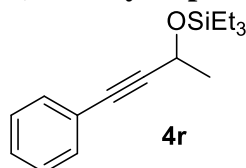

Isolated as a colorless oil in 55% yield (procedure GP2). Spectroscopic data in accordance with literature.<sup>[12]</sup>

**<sup>1</sup>H NMR (400 MHz, CDCl<sub>3</sub>):**  $\delta = 7.43-7.39$  (m, 2H),  $7.32-7.28$  (m, 3H),  $4.74$  (q,  $J = 6.5$  Hz, 1H),  $1.52$  (d,  $J = 6.5$  Hz, 3H),  $1.01$  (t,  $J = 7.9$  Hz, 9H),  $0.73-0.65$  (m, 6H).

**<sup>13</sup>C NMR (100 MHz, CDCl<sub>3</sub>):**  $\delta = 131.7, 128.4, 128.2, 123.3, 91.9, 83.3, 59.2, 25.6, 6.9, 5.0.$

**HRMS (ESI+)** (*m/z*): [M - H]<sup>+</sup> calcd. for C<sub>16</sub>H<sub>23</sub>OSi, 259.1513; found: 259.1516.

**[(4-phenylbut-1-en-3-yn)oxy]triethylsilane**

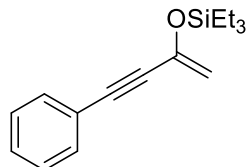

Isolated as a colorless oil in 36% yield (procedure GP2).

**<sup>1</sup>H NMR (400 MHz, CDCl<sub>3</sub>):**  $\delta = 7.47-7.44$  (m, 2H),  $7.35-7.31$  (m, 3H),  $4.78$  (d,  $J = 6.3$  Hz, 2H),  $1.04$  (t,  $J = 7.9$  Hz, 9H),  $0.72-0.74$  (m, 6H).

**<sup>13</sup>C NMR (100 MHz, CDCl<sub>3</sub>):**  $\delta = 139.6, 131.7, 128.7, 128.5, 122.6, 102.9, 87.2, 86.9, 6.8, 5.1.$

**HRMS (ESI+)** (*m/z*): [M - H]<sup>+</sup> calcd. for C<sub>16</sub>H<sub>21</sub>OSi, 257.1356; found: 257.1362.

**(Cyclohex-2-en-1-yloxy)triethylsilane (4s)**

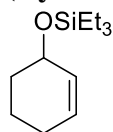

**4s**

Isolated as a colorless oil in 73% yield (procedure GP2).

**<sup>1</sup>H NMR (200 MHz, C<sub>6</sub>D<sub>6</sub>)**  $\delta = 5.88-5.74$  (m, 1H),  $5.73-5.52$  (m, 1H),  $4.22$  (m, 1H),  $1.89-1.57$  (m, 5H),  $1.51-1.25$  (m, 1H),  $1.03$  (t,  $J = 7.8$  Hz, 9H),  $0.75-0.51$  (m, 6H).

**<sup>13</sup>C NMR (50 MHz, C<sub>6</sub>D<sub>6</sub>)**  $\delta = 131.8, 128.8, 66.6, 33.1, 25.3, 19.9, 7.2, 5.5.$

**HRMS (ESI+)** (*m/z*): [M - H]<sup>+</sup> calcd. for C<sub>12</sub>H<sub>23</sub>OSi, 211.1513; found : 211.1510.

**(Cyclohexyloxy)triethylsilane (4w)**

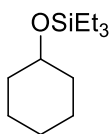

**4w**

Isolated as a colorless oil in 95% yield (procedure GP2). Spectroscopic data in accordance with literature.<sup>[13]</sup>

<sup>1</sup>H NMR (200 MHz, C<sub>6</sub>D<sub>6</sub>)  $\delta$  = 3.74-3.49 (m, 1H), 1.89-1.58 (m, 4H), 1.53-1.30 (m, 3H), 1.29-1.10 (m, 3H), 1.04 (t,  $J$  = 7.9 Hz, 9H), 0.73-0.53 (m, 6H).

<sup>13</sup>C NMR (50 MHz, C<sub>6</sub>D<sub>6</sub>)  $\delta$  = 70.7, 36.5, 26.0, 24.4, 7.3, 5.5.

## 6. Evidence for the crucial role of the N-H function

In order to prove the importance of the role of the ligand N-H group in the hydrosilylation of ketones, the reaction was performed on aldehydes and ketones with catalysts *fac*-[Ru( $\kappa^1$ -OAc)( $\kappa^2$ -OAc)( $\kappa^3$ -PN<sup>H</sup>P<sup>Ph</sup>)] (**2**) and *fac*-[Ru( $\kappa^1$ -OAc)( $\kappa^2$ -OAc)( $\kappa^3$ -PN<sup>Me</sup>P<sup>Ph</sup>)] (**2-Me**) following the general procedure for NMR scale reactions (GP1).

**Table S3.** Reduction of ketones and aldehydes with catalysts **2** or **2-Me**. (0.1 mmol scale)

| Entry | R  | Cat         | Yield (%) |
|-------|----|-------------|-----------|
| 1     | Me | <b>2</b>    | 99        |
| 2     | H  | <b>2</b>    | 99        |
| 3     | Me | <b>2-Me</b> | 0         |
| 4     | H  | <b>2-Me</b> | 99        |

## 7. Study of the selectivity between aldehydes and ketones

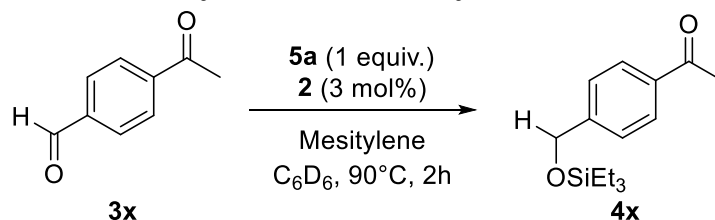

In a glovebox, a *J. Young* NMR Tube was charged with *fac*-[Ru( $\kappa^1$ -OAc)( $\kappa^2$ -OAc)( $\kappa^3$ -PN<sup>H</sup>P<sup>Ph</sup>)] (**1**) (3 mol%), C<sub>6</sub>D<sub>6</sub> (0.4 mL), 4-acetylbenzaldehyde (**3x**) (0.1 mmol, 1 equiv.), mesitylene (10  $\mu$ L) and triethylsilyl formate (**5a**) (1.0 equiv.). The tube was sealed, brought out of the glovebox and heated at 90 °C. The reaction progress was monitored by <sup>1</sup>H NMR spectroscopy versus mesitylene as an internal standard. After 2 h at 90 °C, the aldehyde is fully hydro-silylated whereas the ketone remains unchanged.

NMR spectra for the transfer hydro-silylation of 4-acetylbenzaldehyde (**3x**) with Et<sub>3</sub>SiOCHO (**5a**) is given in Figure S2. Spectroscopic data is in accordance with literature.<sup>[14]</sup>

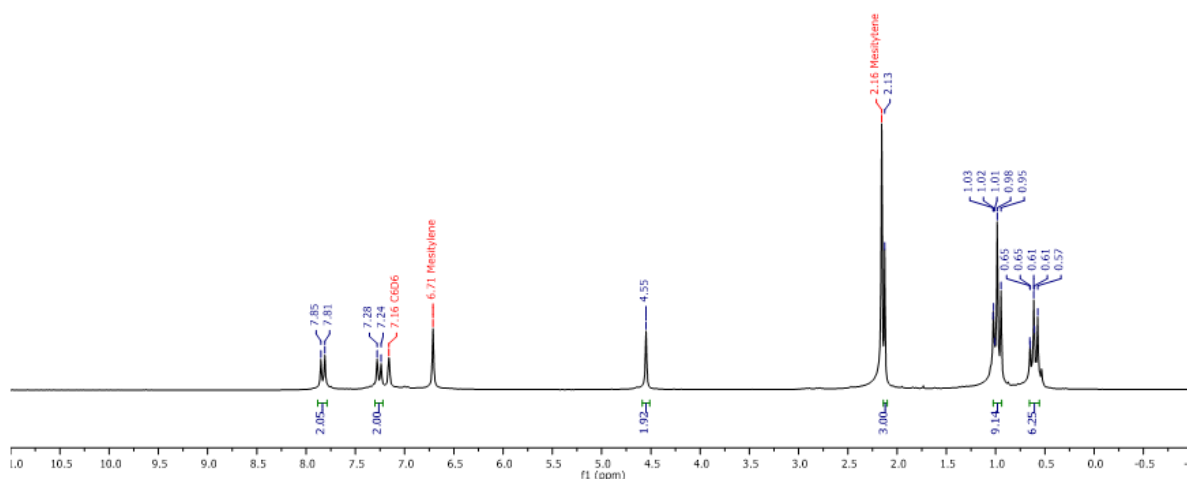

**Figure S2.** <sup>1</sup>H NMR spectra obtained in C<sub>6</sub>D<sub>6</sub> for the transfer hydro-silylation of 4-acetylbenzaldehyde (**3x**) with Et<sub>3</sub>SiOCHO (**5a**). Crude mixture after heating 2 h at 90 °C.

## 8. TESOCDO synthesis

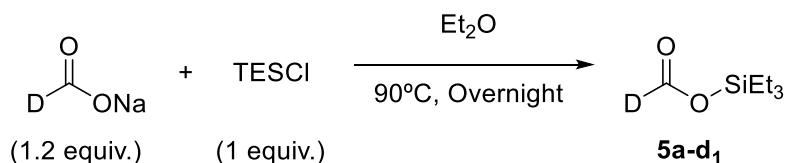

Deuterated silylformate **5a-d<sub>1</sub>** was synthesized according to literature.<sup>[3]</sup> An oven-dried flask equipped with a *J-Young* valve was charged with deuterated sodium formate (1.2 equiv.), diethylether (11 mL) and triethylsilylchloride (10.9 mmol) under inert atmosphere. The final mixture was stirred at 90 °C overnight. Once the reaction is complete, the reaction was cold down and filtered in the glovebox through a plug of Celite. The liquid phase was collected and concentrated under vacuum at 0 °C for 2h to yield the pure product as a colourless liquid in 83% yield.

<sup>1</sup>H NMR (400 MHz, C<sub>6</sub>D<sub>6</sub>): δ = 0.91 (t, *J* = 7.8 Hz, 9H), 0.72-0.64 (m, 6H).

<sup>13</sup>C NMR (100 MHz, C<sub>6</sub>D<sub>6</sub>): δ = 160.2 (t, *J* = 33.6 Hz), 6.6, 4.8.

<sup>29</sup>Si NMR (79 MHz, C<sub>6</sub>D<sub>6</sub>): δ = 26.5.

<sup>2</sup>H-NMR (61 MHz, Toluene): 7.76.

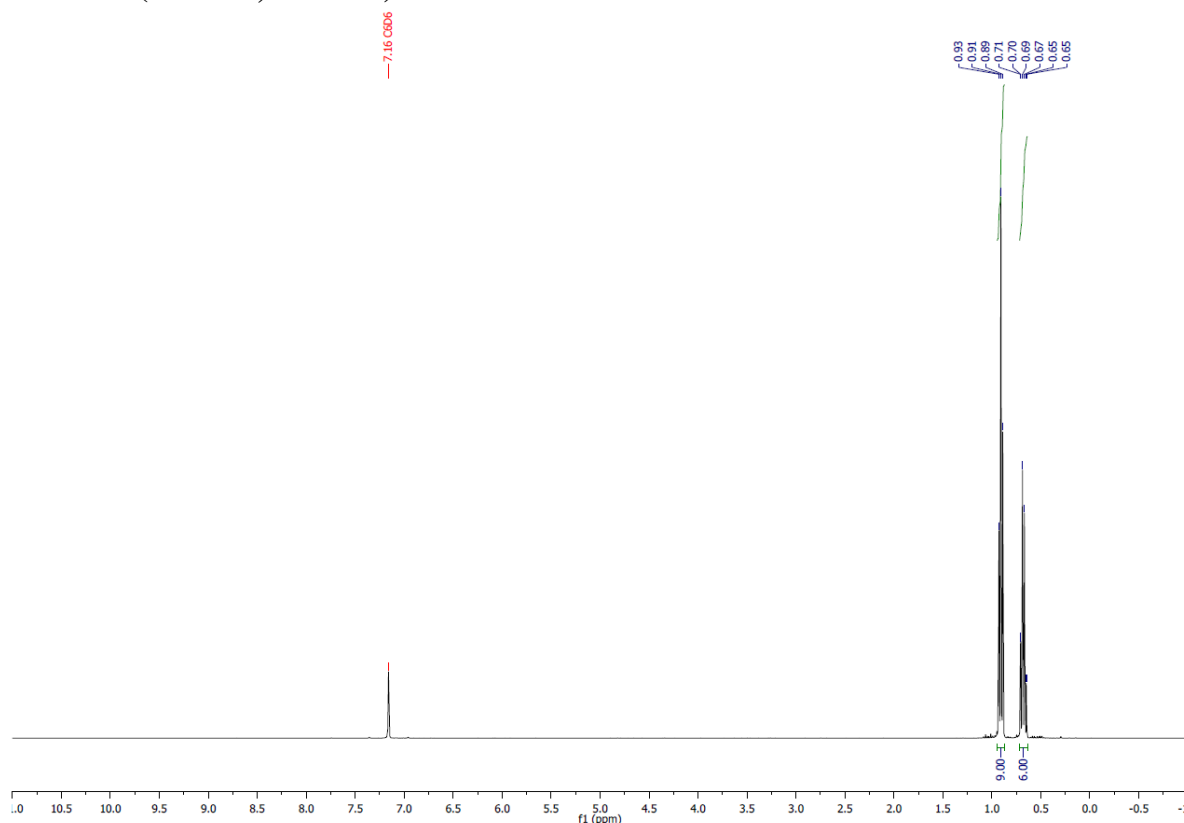

Figure S3. <sup>1</sup>H NMR of TESOCDO in C<sub>6</sub>D<sub>6</sub>.

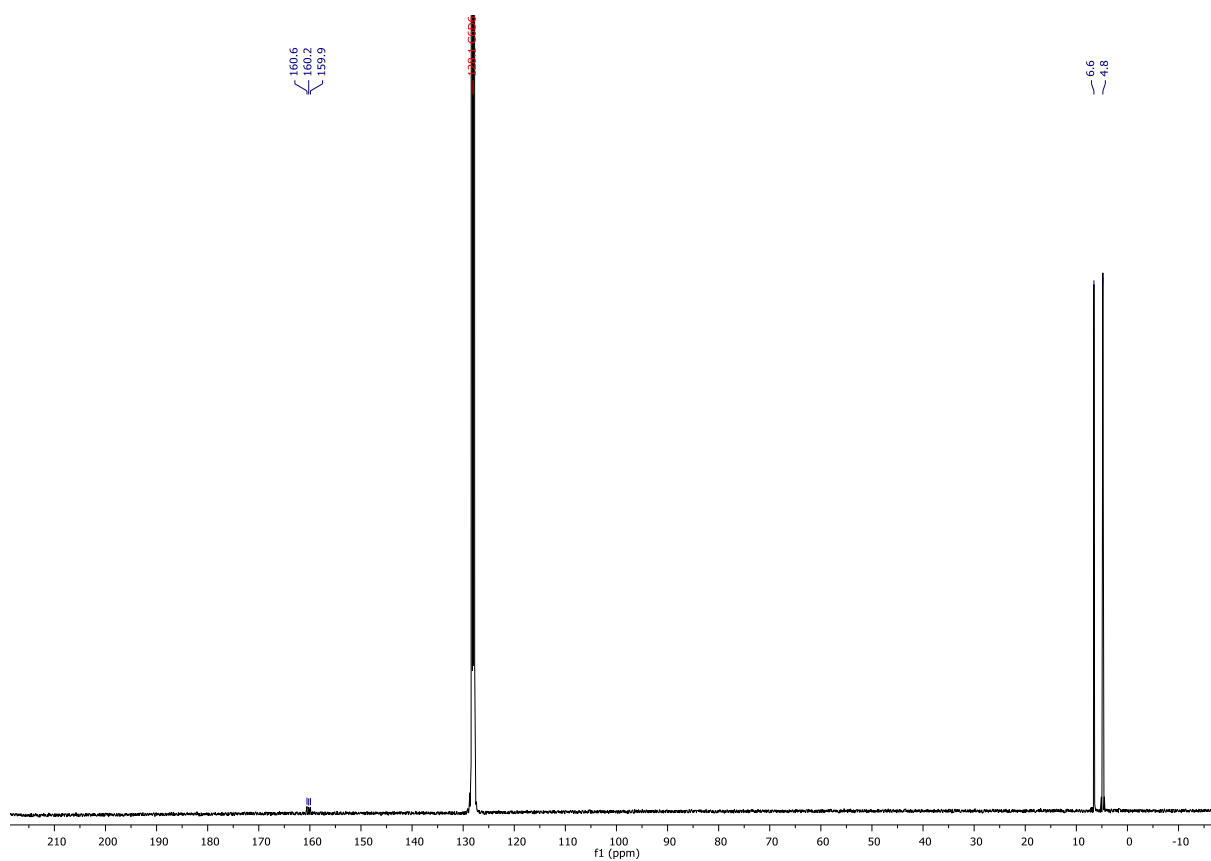

Figure S4.  $^{13}\text{C}$  NMR of TESCO in  $\text{C}_6\text{D}_6$ .

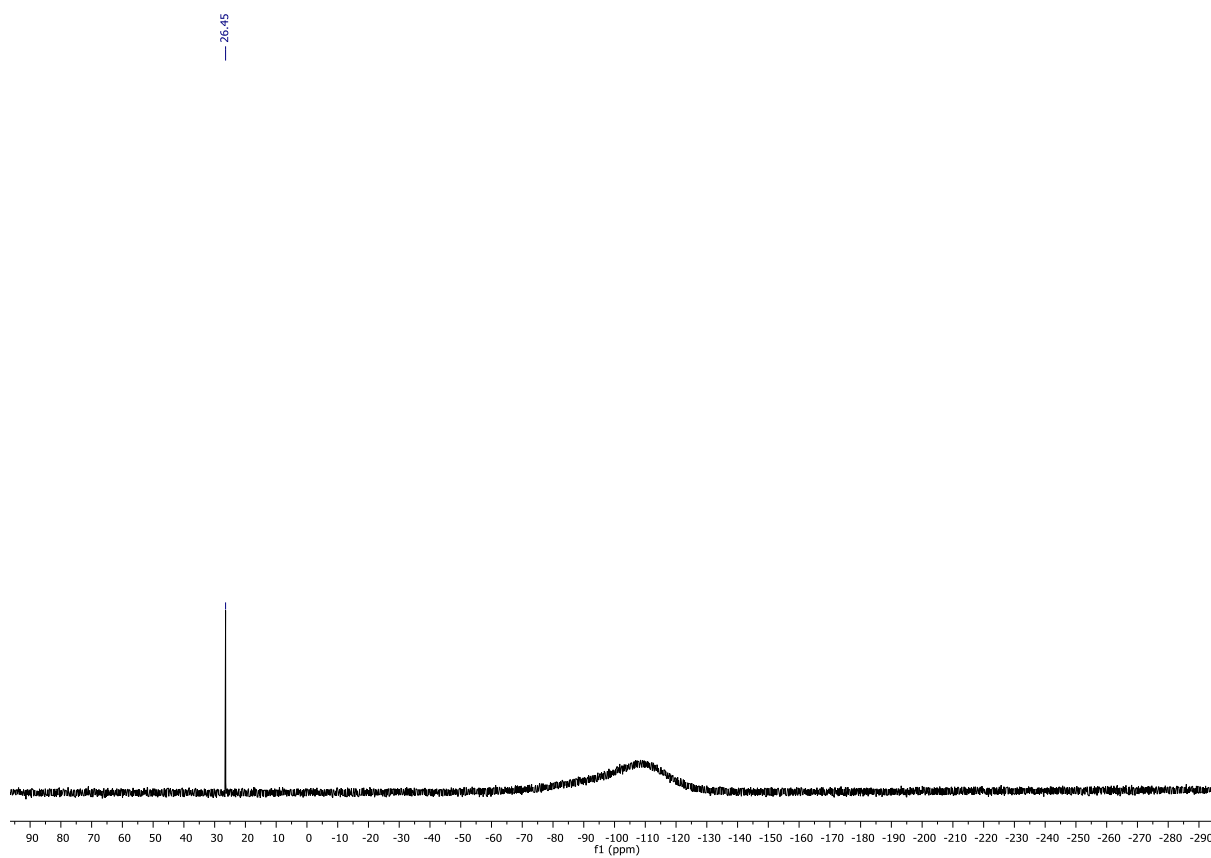

Figure S5.  $^{29}\text{Si}$  NMR of TESCO in  $\text{C}_6\text{D}_6$ .

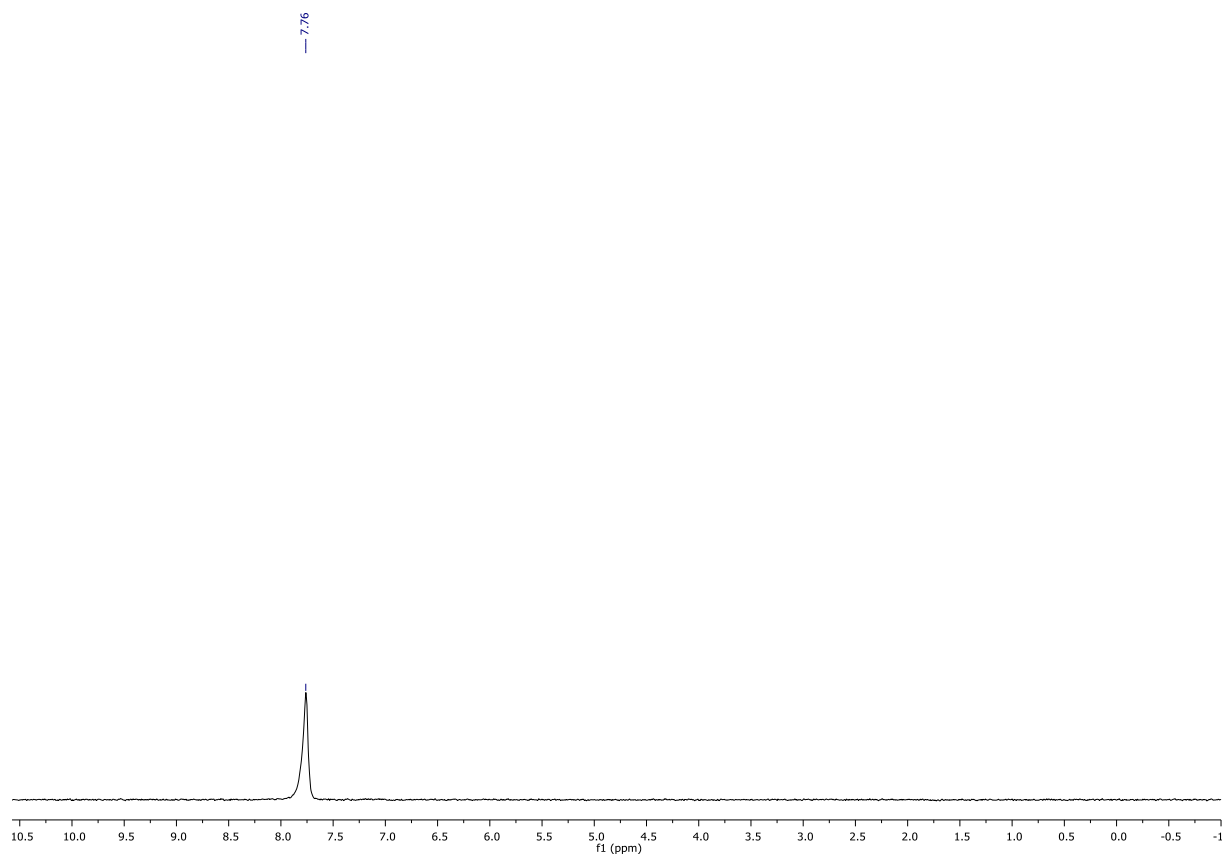

**Figure S6.**  $^2\text{H}$  NMR of TESCDO in toluene.

## 9. Deuterium labelling experiment

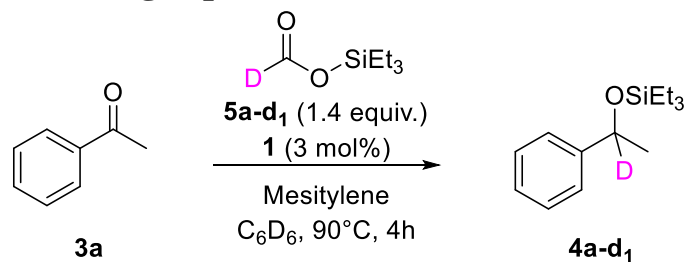

Acetophenone hydrosilylation was carried out according to general procedure for NMR scale reactions and **5a-d<sub>1</sub>** as silylformate source. The final product **4a-d<sub>1</sub>** was obtained in 99% NMR yield with complete selectivity. Spectroscopic data is in accordance with literature.<sup>[5]</sup>

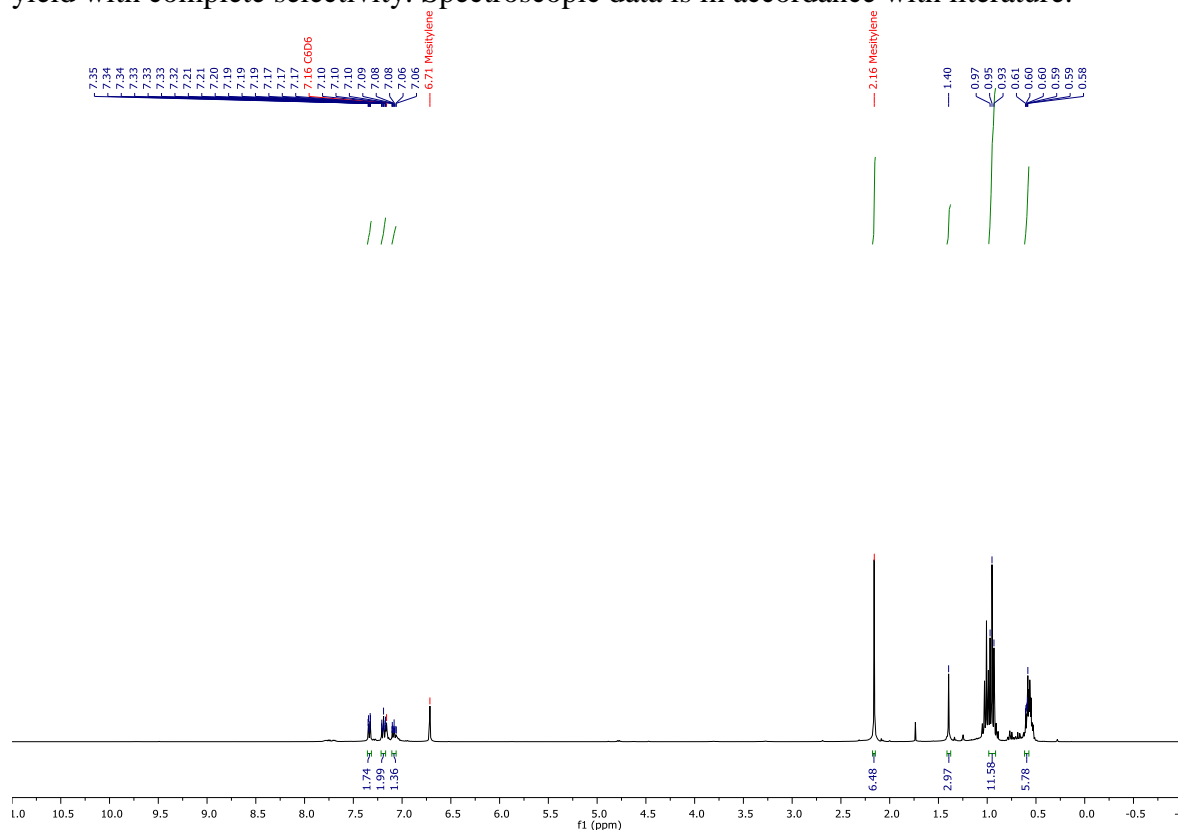

**Figure S7.**  $^1H$  NMR spectra obtained in  $C_6D_6$  for the transfer hydrosilylation of acetophenone (**3a**) with  $Et_3SiCDO$  (**5a-d<sub>1</sub>**). Crude mixture after heating 4 h at  $90^\circ C$ .



## 10. Experimental evidence of ruthenium monohydride species.

In a glovebox, a *J. Young* NMR Tube was charged with *fac*-[Ru( $\kappa^1$ -OAc)( $\kappa^2$ -OAc)( $\kappa^3$ -PN<sup>H</sup>P<sup>Ph</sup>)] (**2**) (3 mol%), C<sub>6</sub>D<sub>6</sub> (0.4 mL), ketone (0.1 mmol, 1.0 equiv.), mesitylene (10  $\mu$ L) and triethylsilyl formate (**5a**) (1.4 equiv.). The tube was sealed, brought out of the glovebox and heated at 90  $^{\circ}$ C. The reaction was monitored by <sup>1</sup>H NMR spectroscopy after 1.5 minutes of reaction.

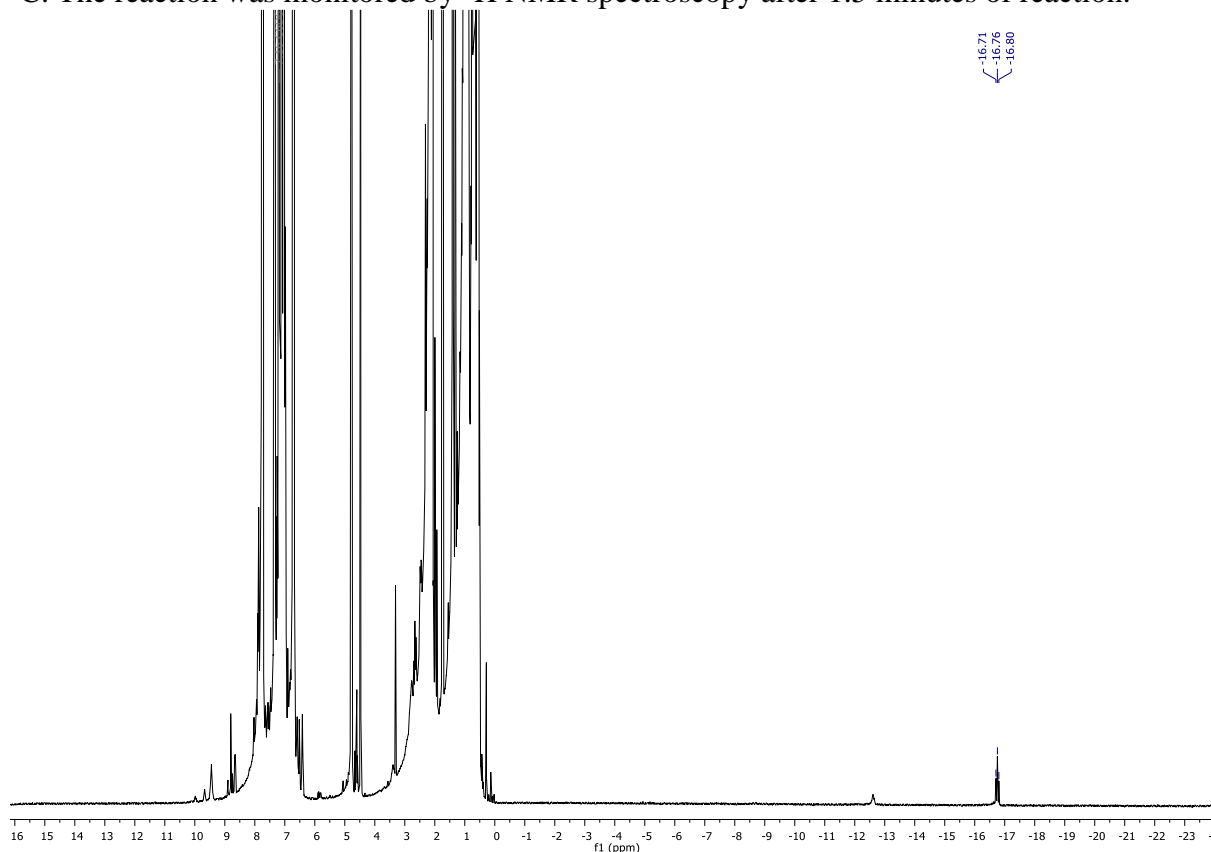

**Figure S8.** <sup>1</sup>H NMR spectra obtained in C<sub>6</sub>D<sub>6</sub> for the transfer hydrosilylation of acetophenone (**3a**) with Et<sub>3</sub>SiCHO (**5a**). Crude mixture after heating 1.5 min at 90  $^{\circ}$ C showing the presence of a Ru-H signal

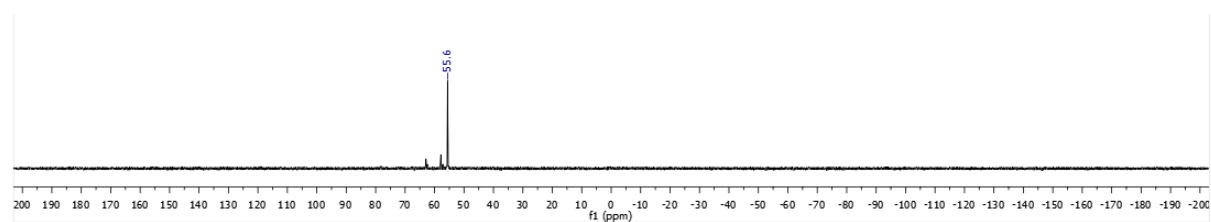

**Figure S9.** <sup>31</sup>P NMR spectra obtained in C<sub>6</sub>D<sub>6</sub> for the transfer hydrosilylation of acetophenone (**3a**) with Et<sub>3</sub>SiCHO (**5a**). Crude mixture after heating 1.5 min at 90  $^{\circ}$ C showing the presence of a Ru-H signal

## 11. Competition reactions

In order to test the compatibility of the reaction with free alcohols, amines, amides and carboxylic acids, the benchmark reaction was performed in presence of additives **8** containing these functional groups (benzamide (**8a**), benzyl alcohol (**8b**), morpholine (**8c**), and benzoic acid (**8d**), Table S4). Knowing that alcohols and carboxylic acids are silylated in presence of silyl formate **5**<sup>[15]</sup>, we envisaged that the same will occur with free amides and amines, which is why an excess of silyl formate was used in those reactions (2.4 – 3 equiv).

Compared to the benchmark reaction (Table S4, entry 1), the presence of additives slowed the reaction: 4.5 – 20 h were necessary to observe full conversion in contrast to 1.5 h in the benchmark reaction (Table S4). In presence of benzamide (**8a**), the reaction was completed within 6.5 h with a yield of 82% (entry 1). Benzyl alcohol (**8b**), morpholine (**8c**), and benzoic acid (**8d**) showed a detrimental effect on the reaction, the yield of **4a** being lowered to 24 – 58%, due to the presence of numerous side-products (entries 3-5). Silylation of alcohol **8b** and carboxylic acid **8d** was observed, whereas in the case of benzamide (**8a**) and morpholine (**8c**) derivatives, it was not possible to identify the products resulting from their reactions with silylformate **5a**.

**Table S4.** Reduction of ketone **3a** in presence of additives **8** with silyl formate **5a**. (0.1 mmol scale)

| Entry | Additive  | 5 (equiv.) | t(h)     | Yield (%) |
|-------|-----------|------------|----------|-----------|
| 1     | -         | 2.4        | 1.5      | 99        |
| 2     | <b>8a</b> | 2.4        | 6.5      | 82        |
| 3     | <b>8b</b> | 2.4        | 4.5 (20) | 21 (45)   |
| 4     | <b>8c</b> | 2.4        | 4.5      | 24        |
| 5     | <b>8d</b> | 3          | 4.5      | 58        |

  

|  |                      |
|--|----------------------|
|  | <br>$P = PPh_2$      |
|  | <b>Additives</b><br> |

## 12. NMR spectra of isolated compounds

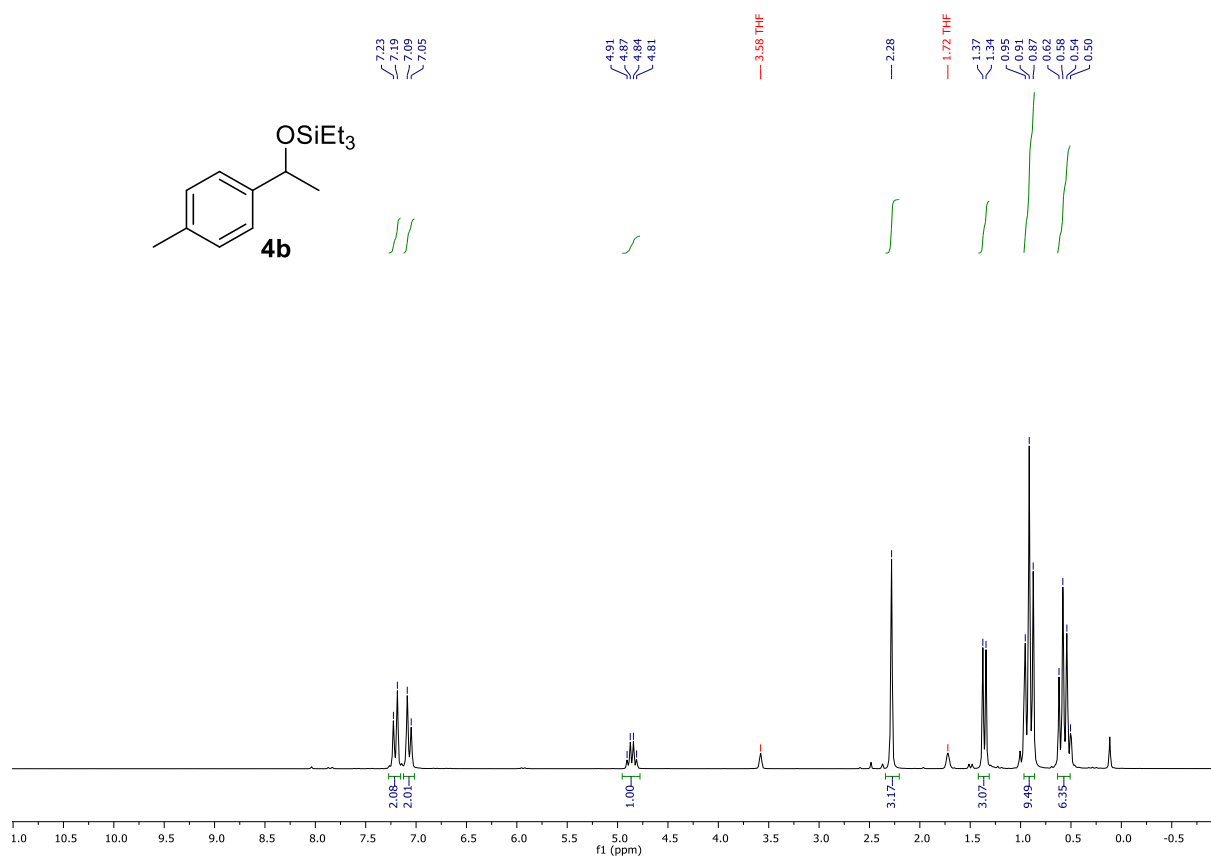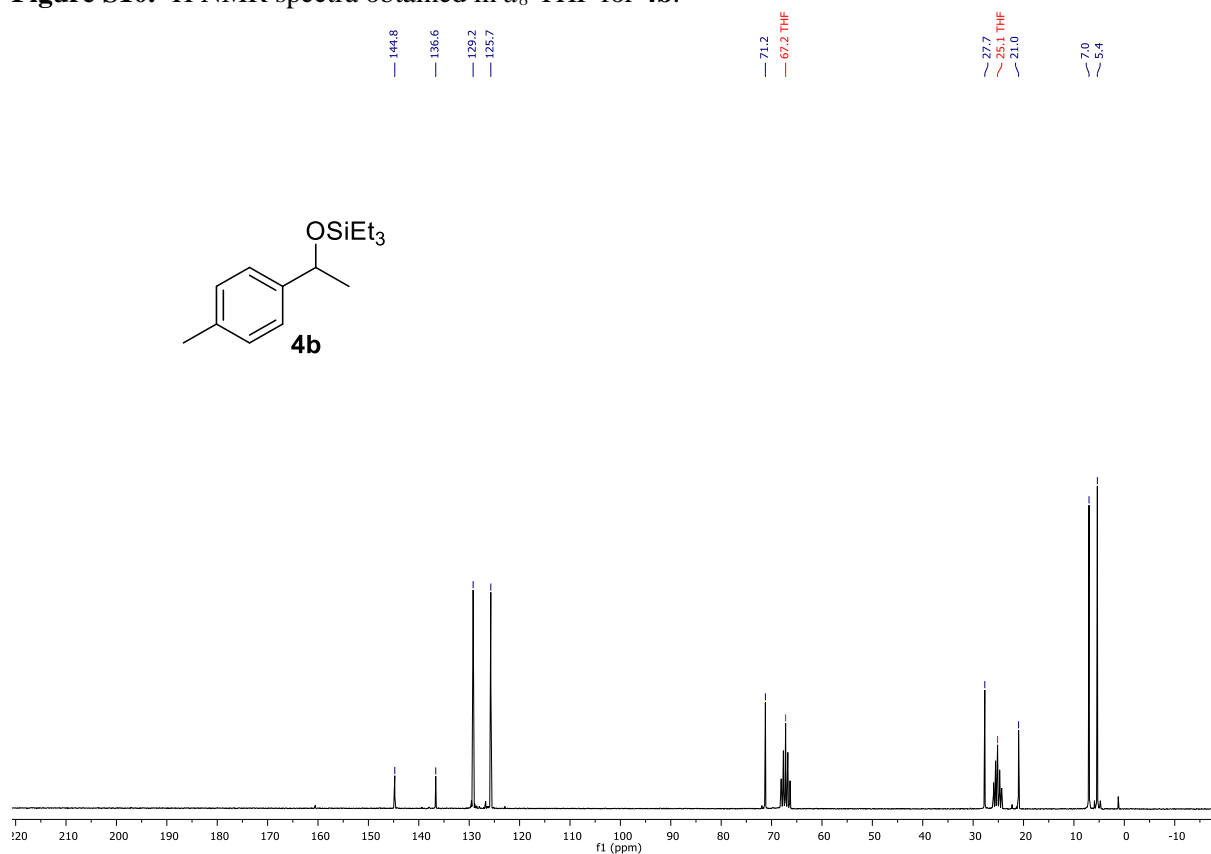

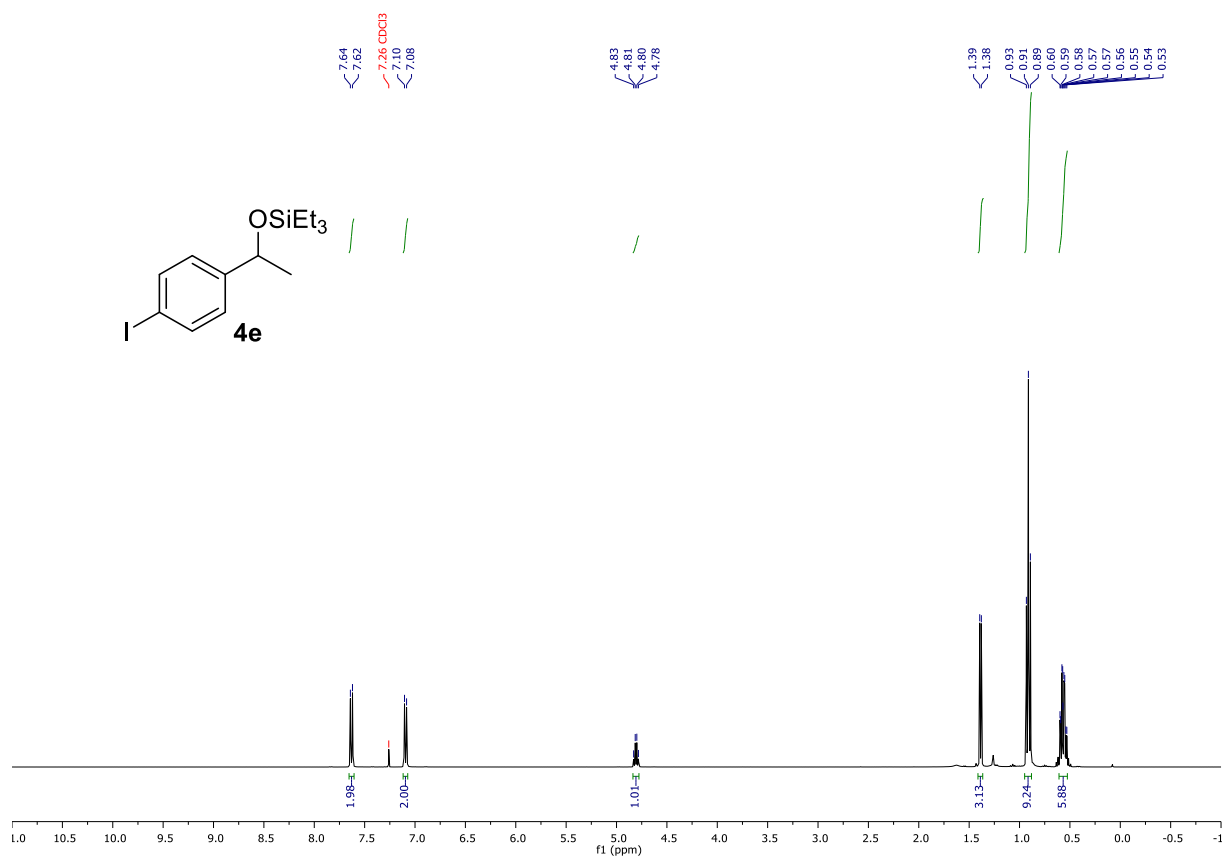

Figure S12. <sup>1</sup>H NMR spectra obtained in CDCl<sub>3</sub> for **4e**.

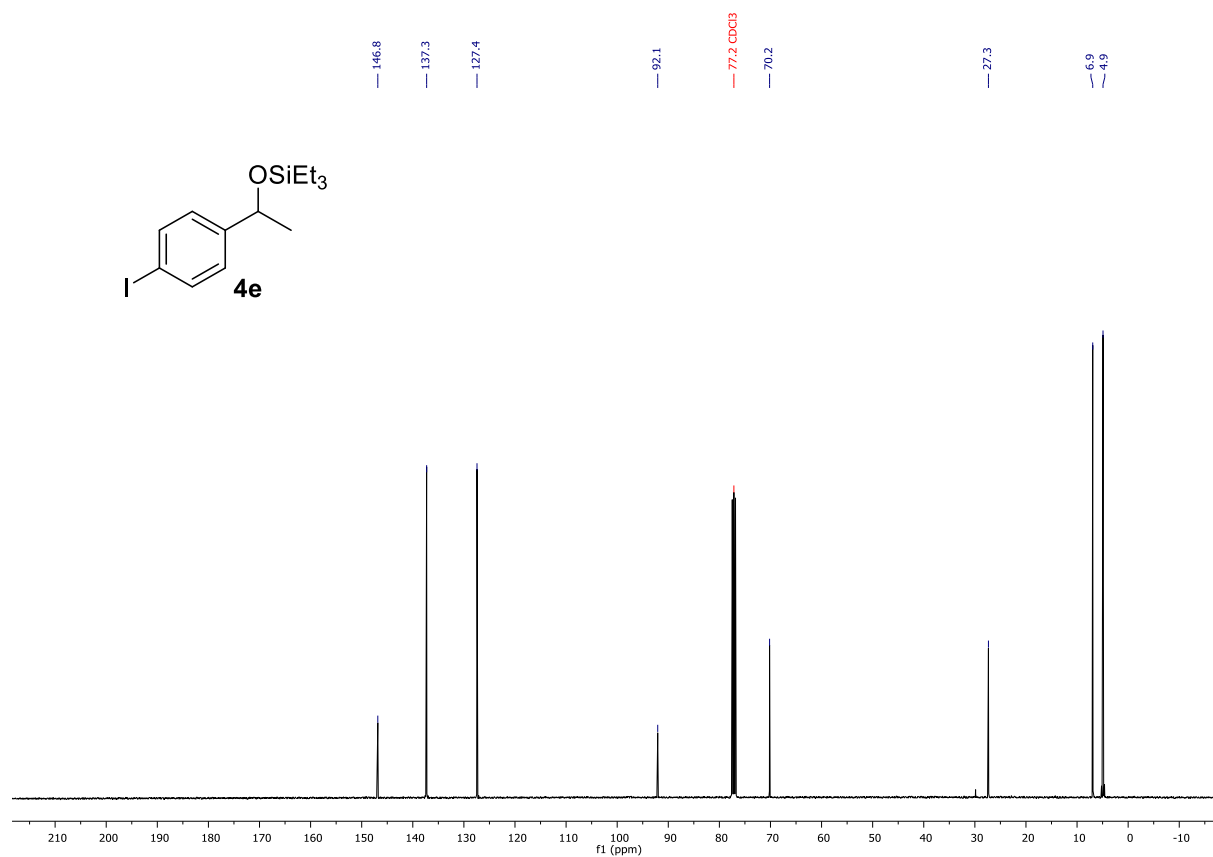

Figure S13. <sup>13</sup>C NMR spectra obtained in CDCl<sub>3</sub> for **4e**.

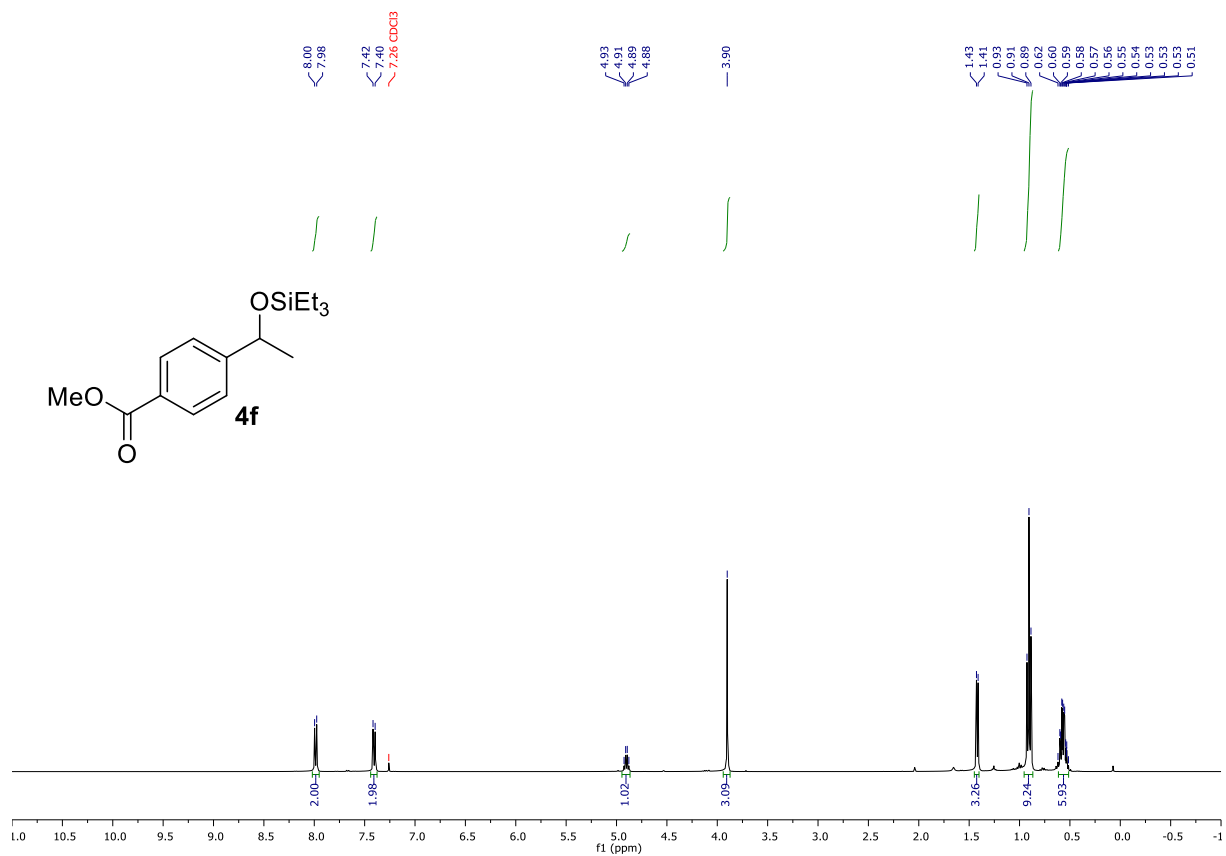

Figure S14. <sup>1</sup>H NMR spectra obtained in CDCl<sub>3</sub> for **4f**.

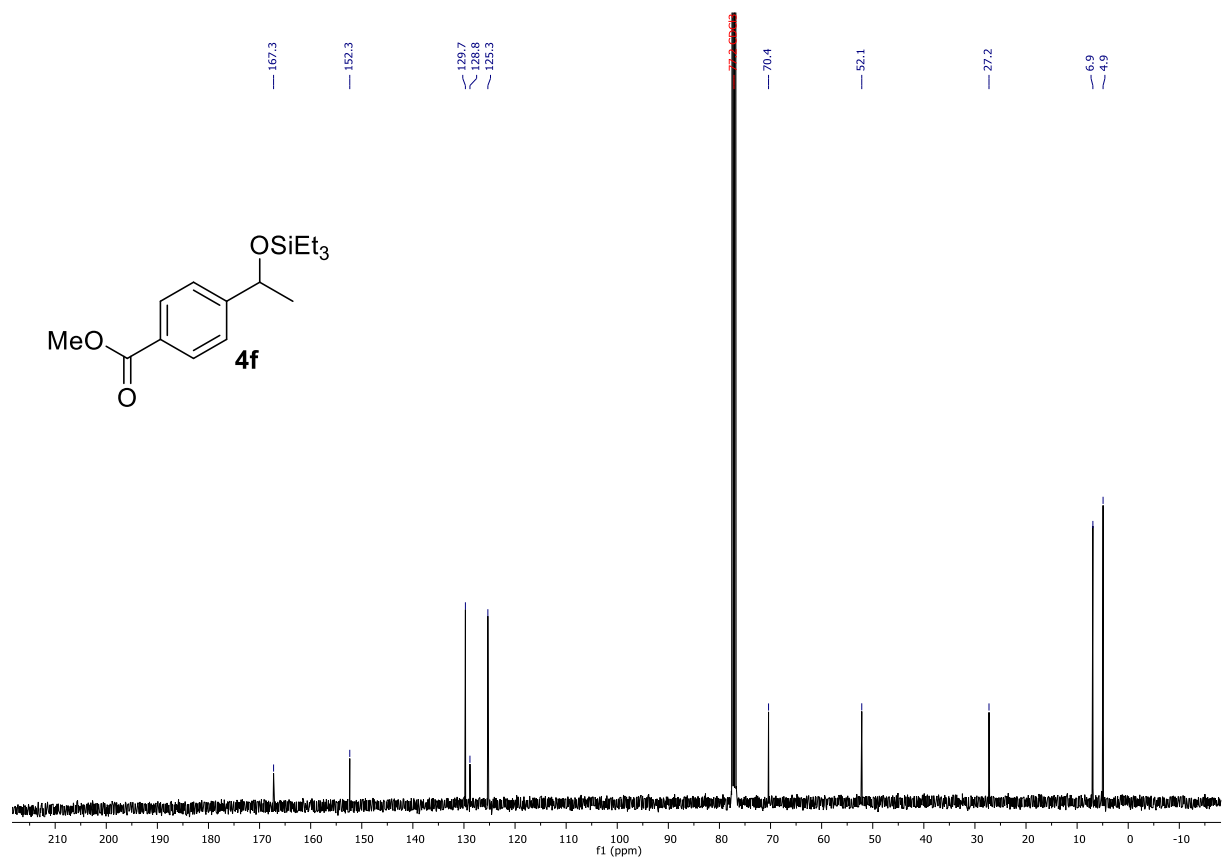

Figure S15. <sup>13</sup>C NMR spectra obtained in CDCl<sub>3</sub> for **4f**.

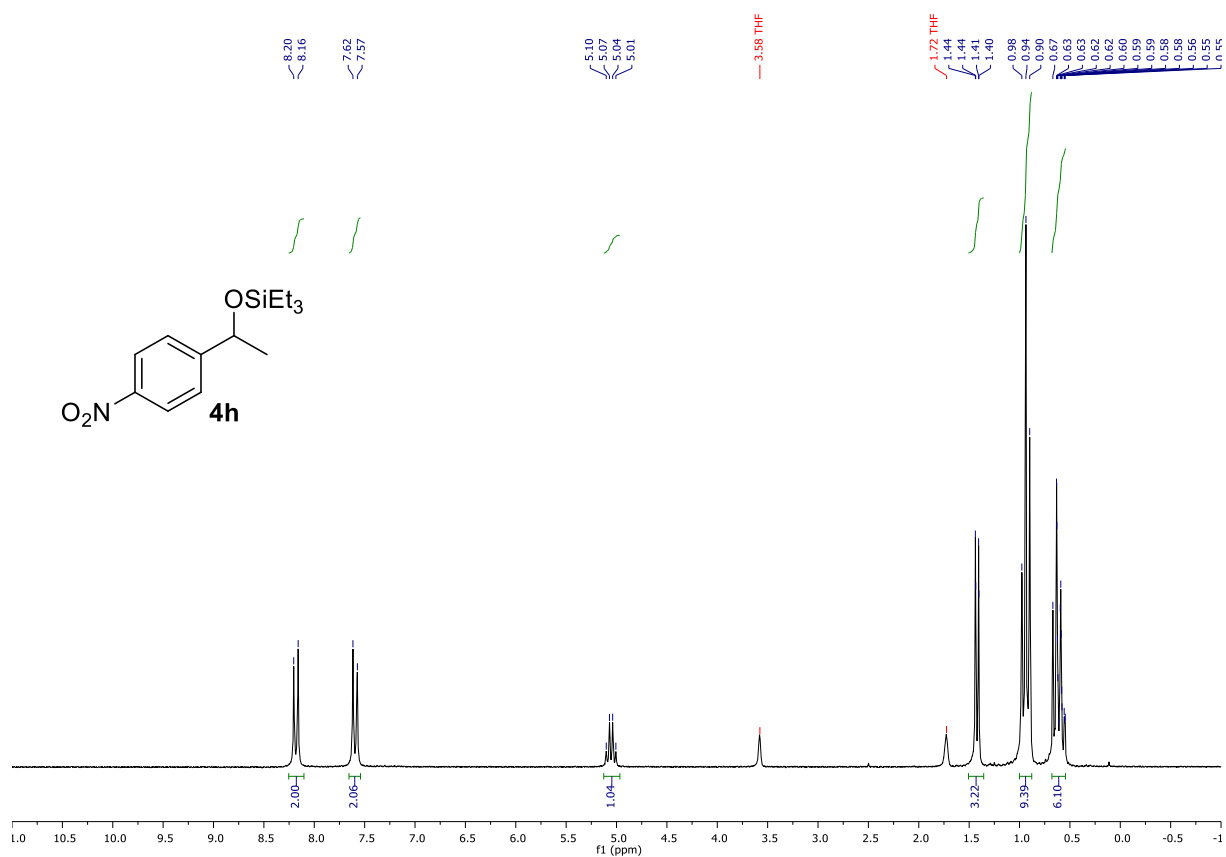

Figure S16. <sup>1</sup>H NMR spectra obtained in *d*<sub>8</sub>-THF for **4h**.

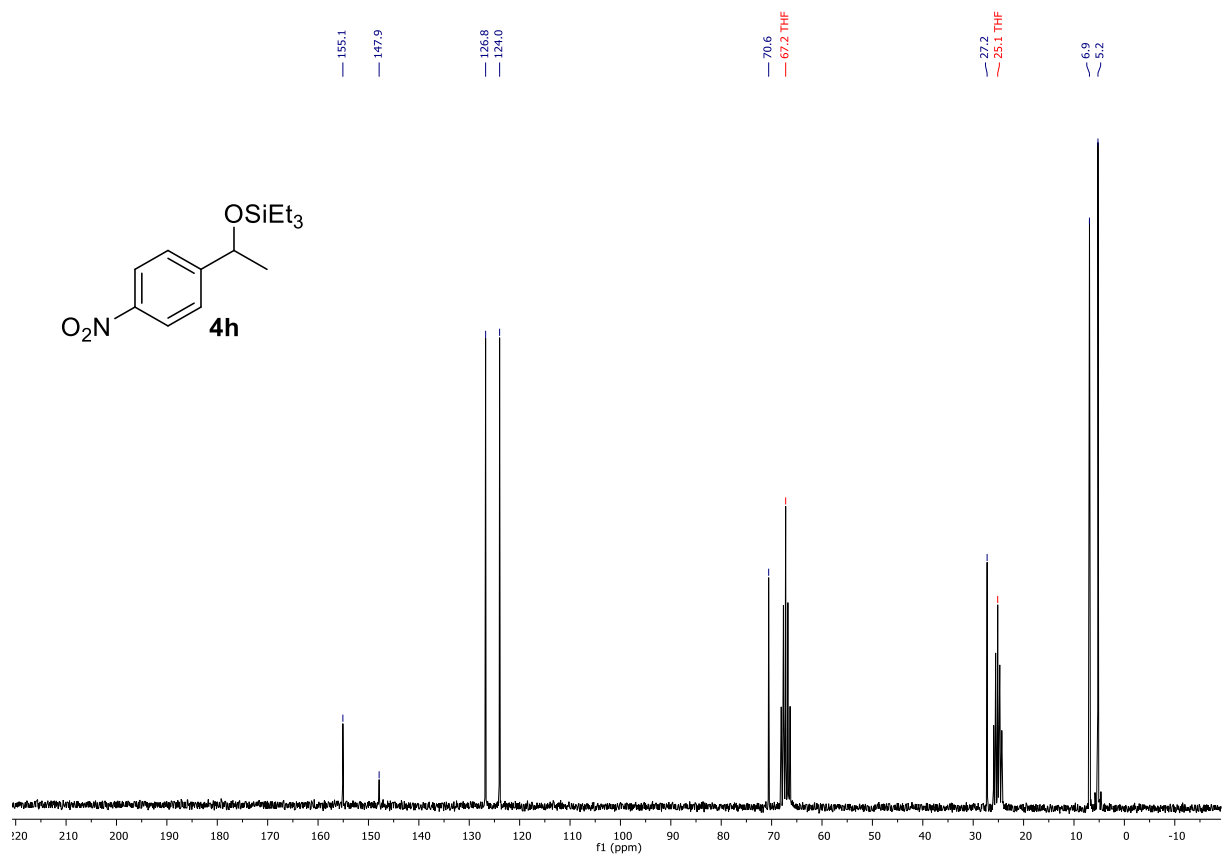

Figure S17. <sup>13</sup>C NMR spectra obtained in *d*<sub>8</sub>-THF for **4h**.

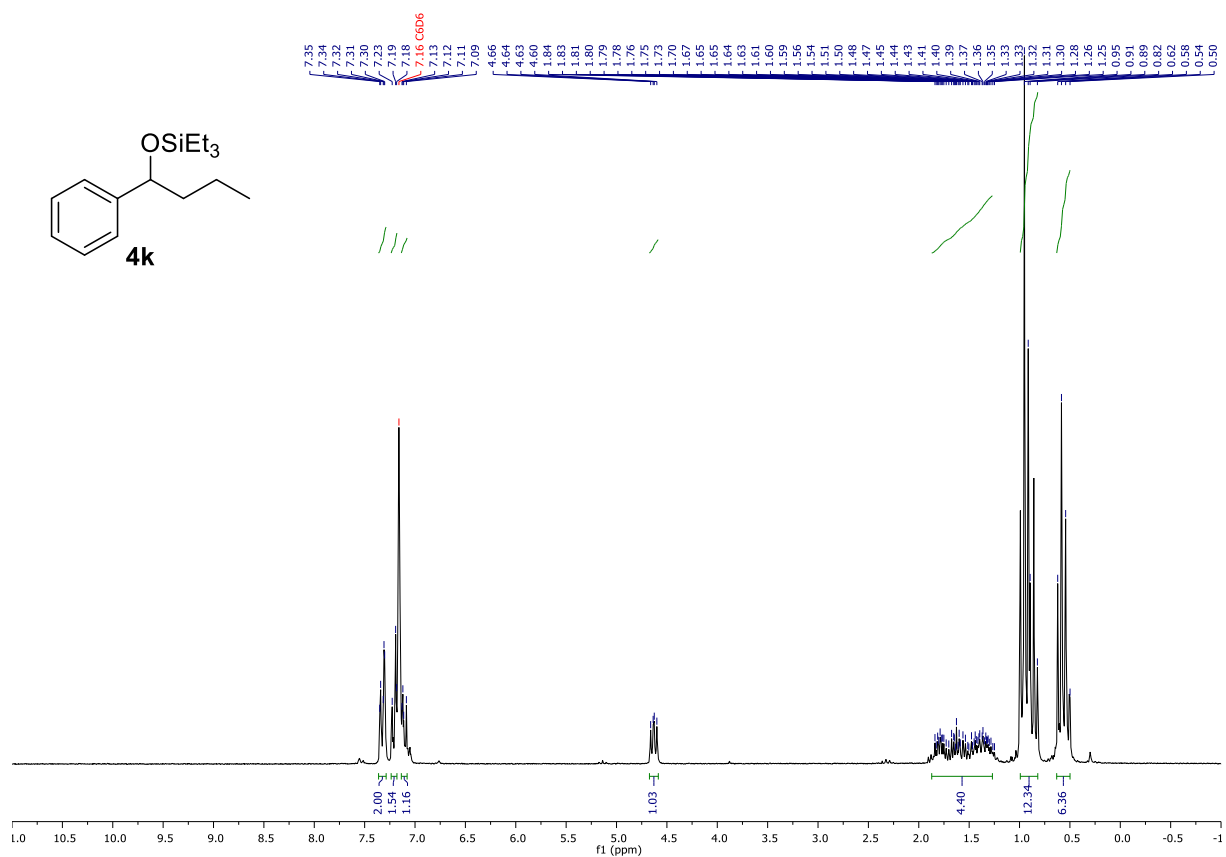

Figure S18.  $^1\text{H}$  NMR spectra obtained in  $\text{C}_6\text{D}_6$  for **4k**.

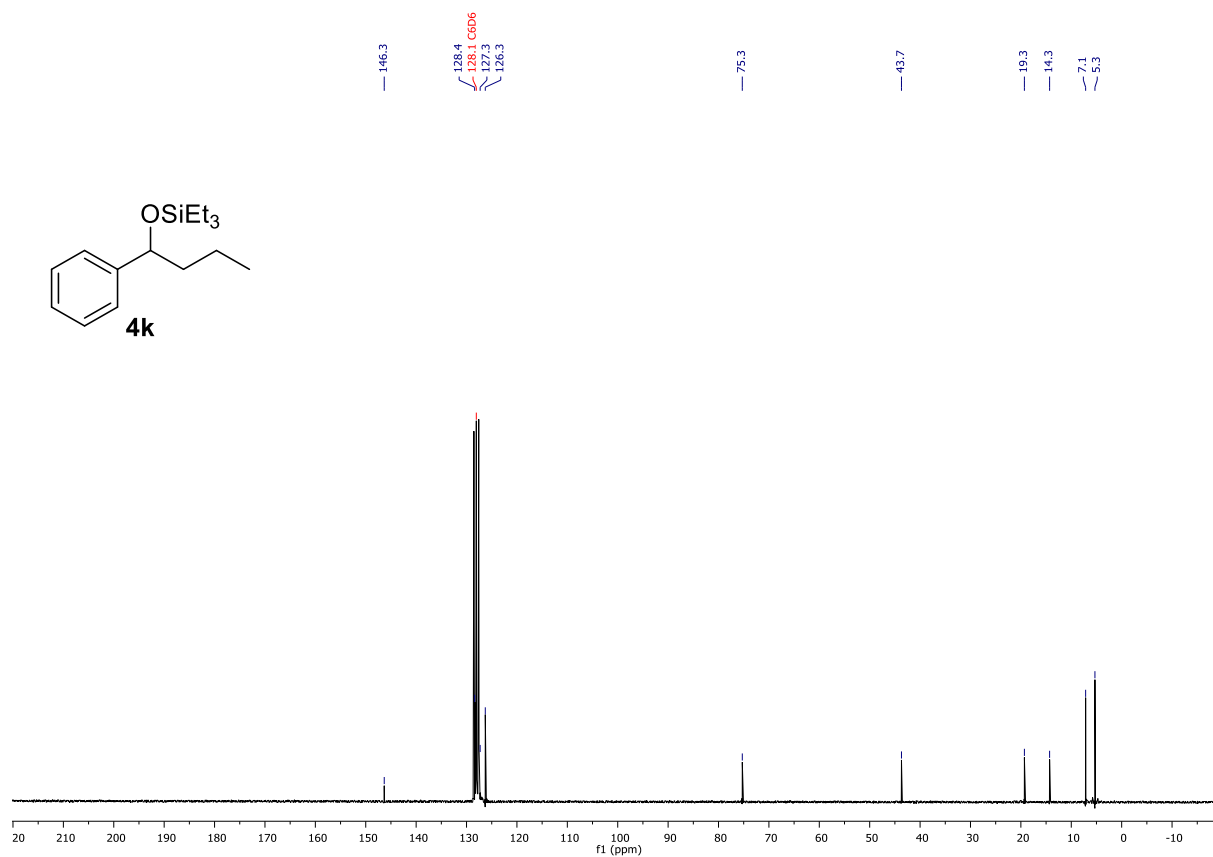

Figure S19.  $^{13}\text{C}$  NMR spectra obtained in  $\text{C}_6\text{D}_6$  for **4k**.

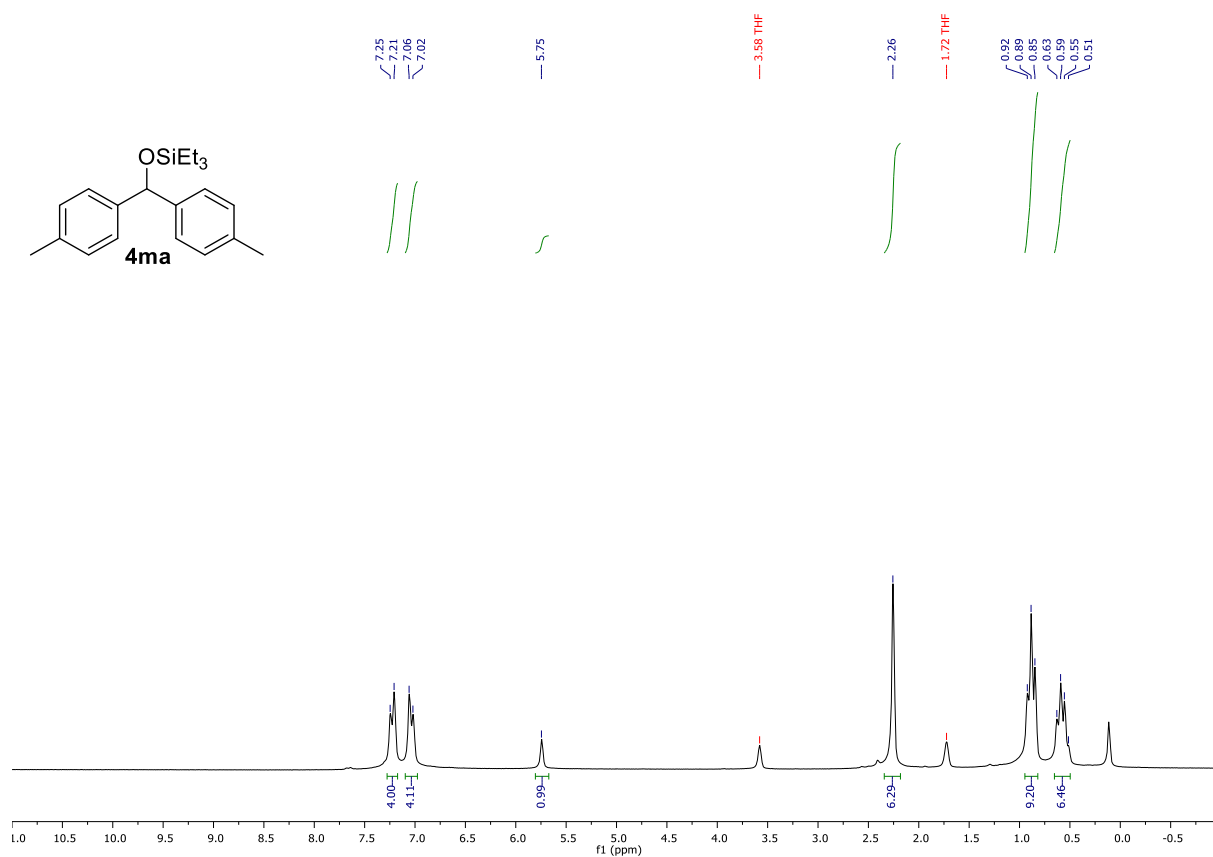

**Figure S20.** <sup>1</sup>H NMR spectra obtained in *d*<sub>8</sub>-THF for **4ma**.

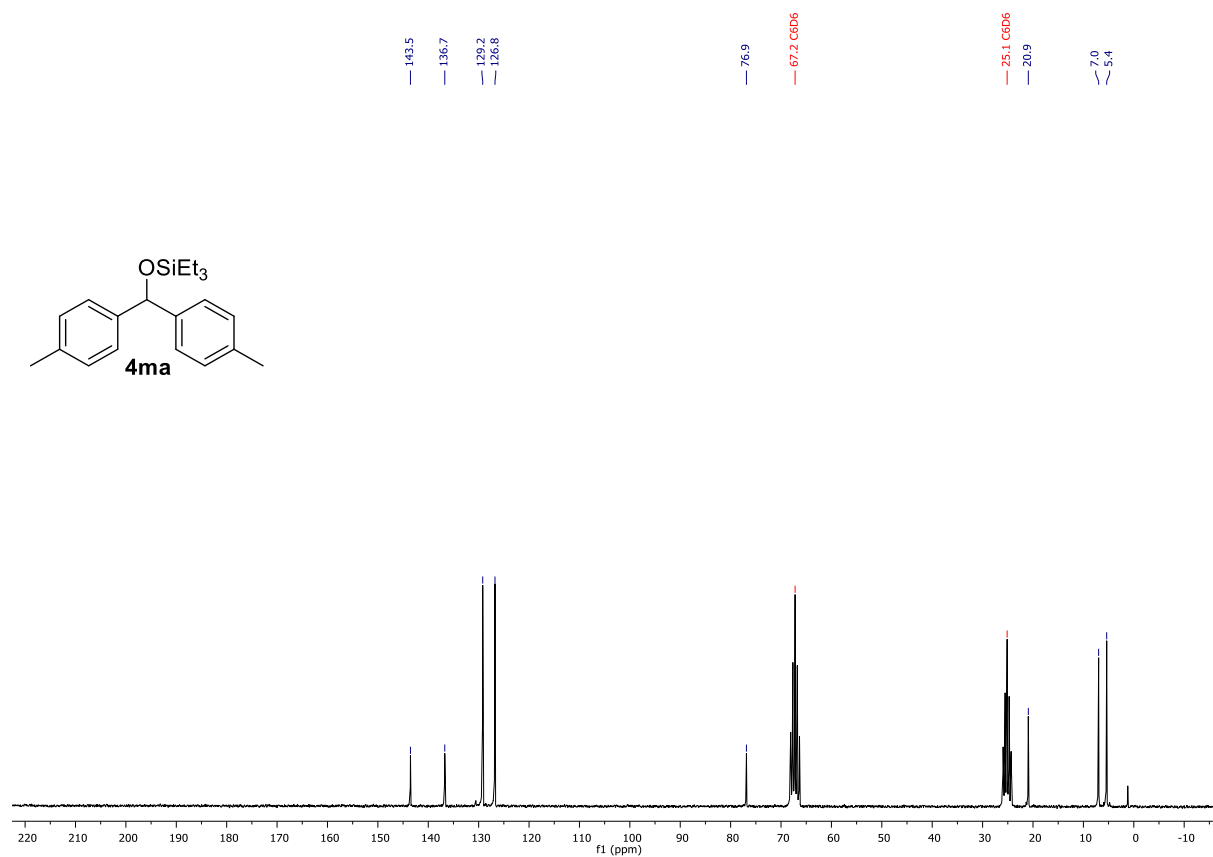

**Figure S21.** <sup>13</sup>C NMR spectra obtained in *d*<sub>8</sub>-THF for **4ma**.



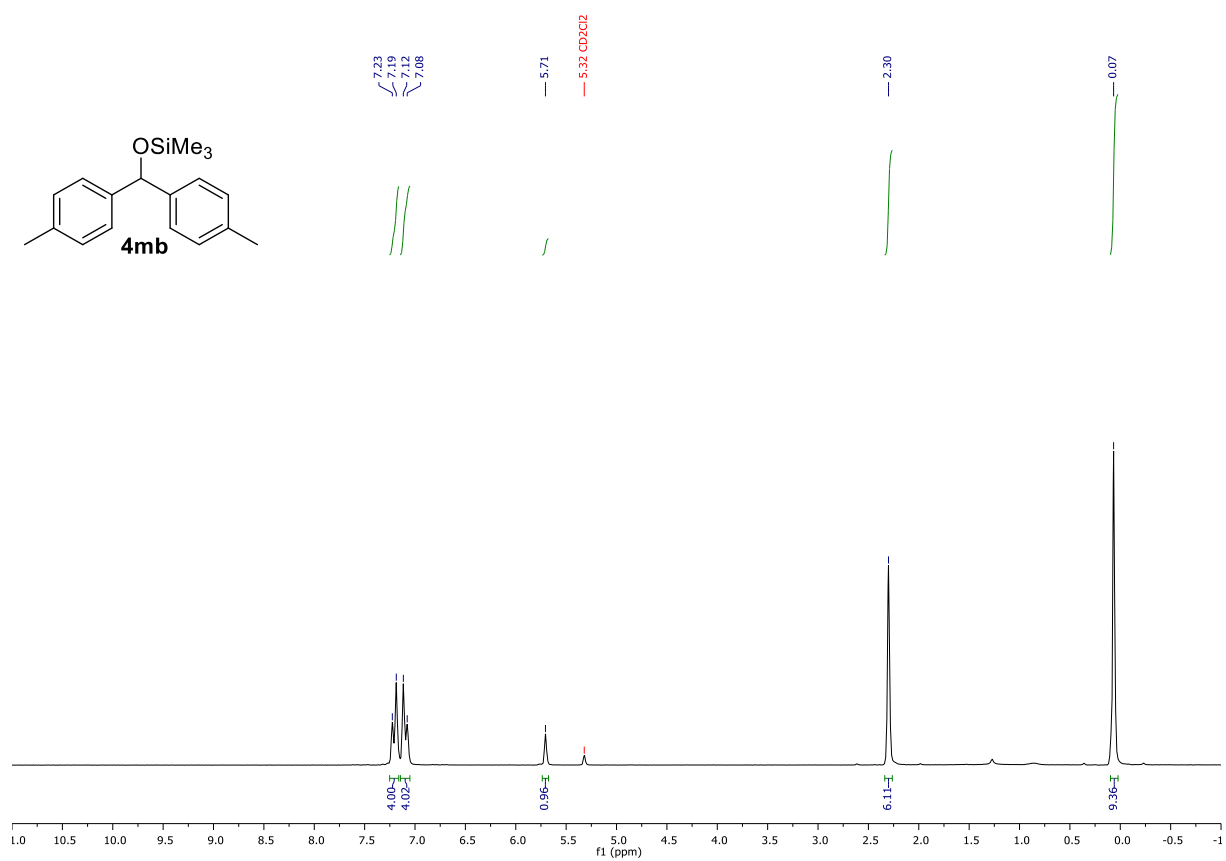

Figure S22. <sup>1</sup>H NMR spectra obtained in CD<sub>2</sub>Cl<sub>2</sub> for **4mb**.

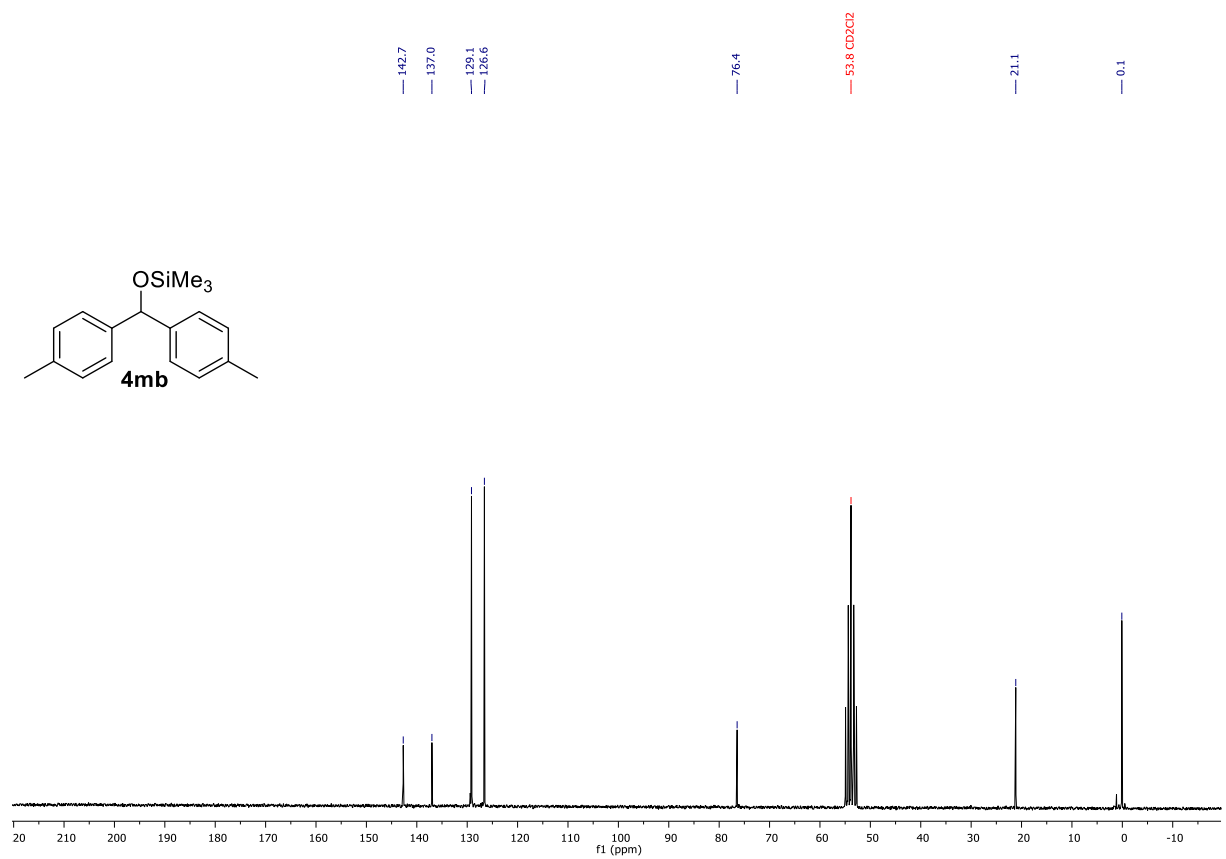

Figure S23. <sup>13</sup>C NMR spectra obtained in CD<sub>2</sub>Cl<sub>2</sub> for **4mb**.

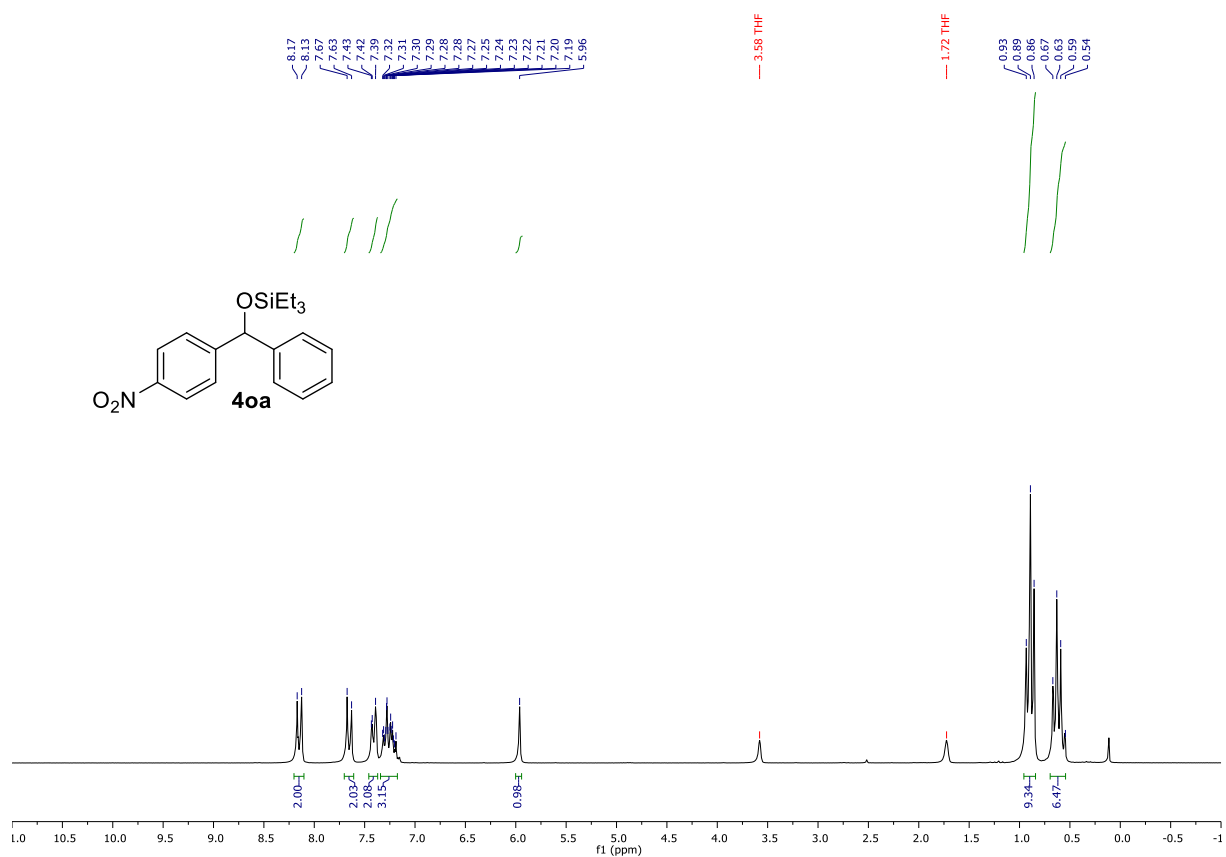

Figure S24. <sup>1</sup>H NMR spectra obtained in *d*<sub>8</sub>-THF for **4a**.

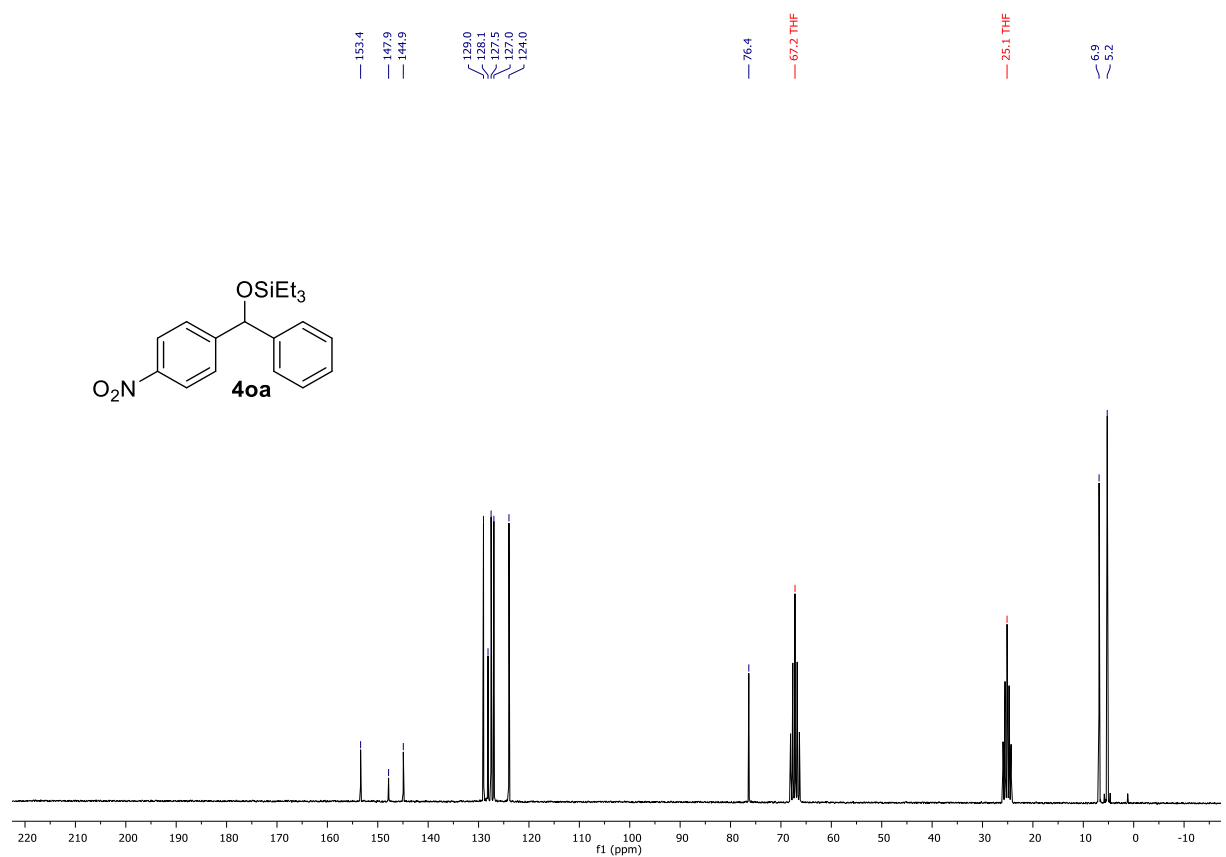

Figure S25. <sup>13</sup>C NMR spectra obtained in *d*<sub>8</sub>-THF for **4a**.

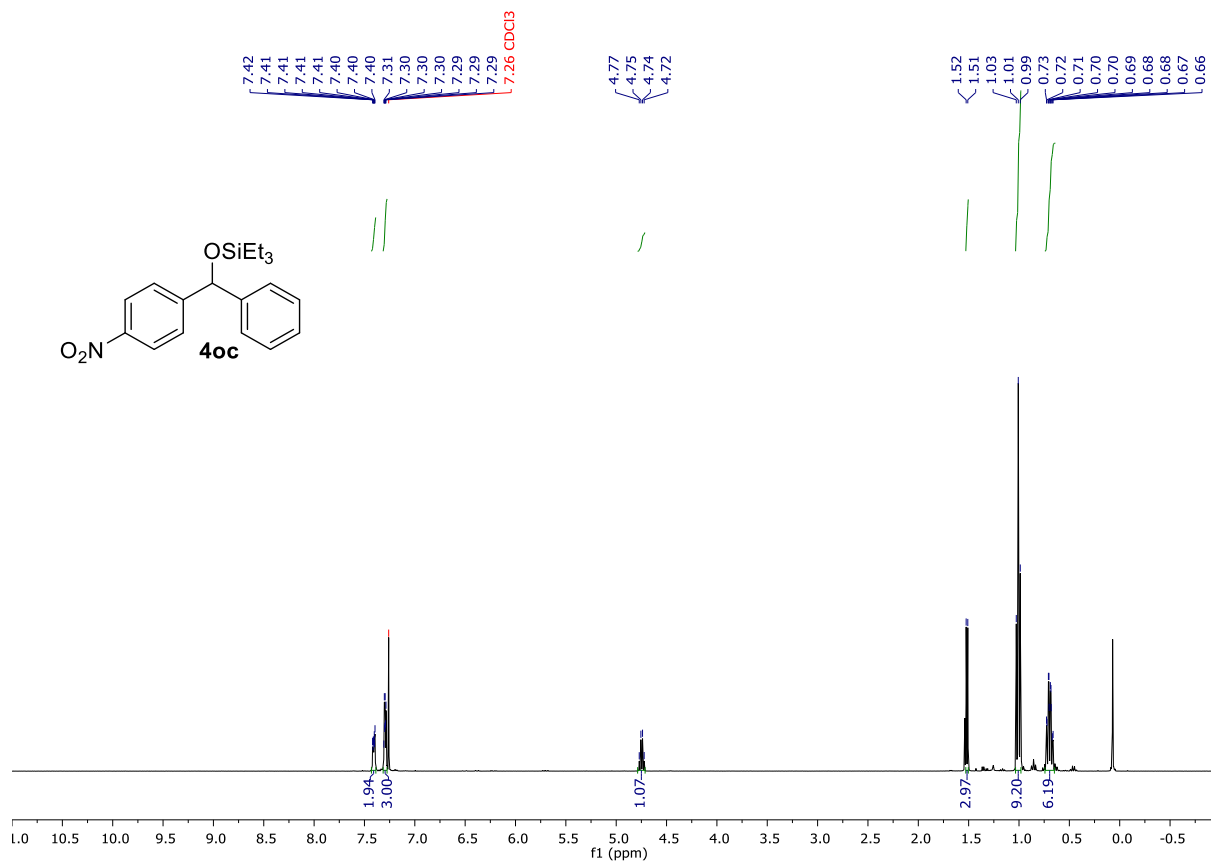

Figure S26. <sup>1</sup>H NMR spectra obtained in CDCl<sub>3</sub> for **4oc**.

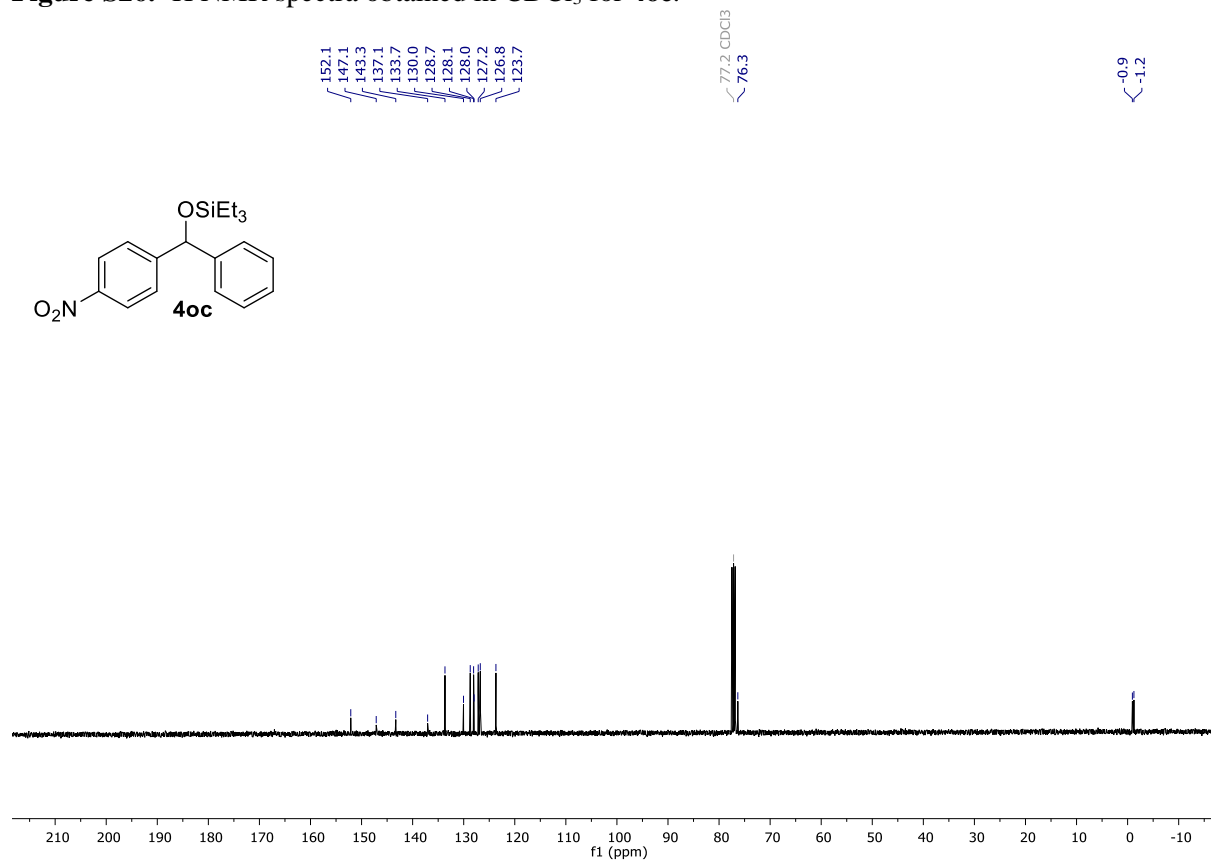

Figure S27. <sup>13</sup>C NMR spectra obtained in CDCl<sub>3</sub> for **4oc**.

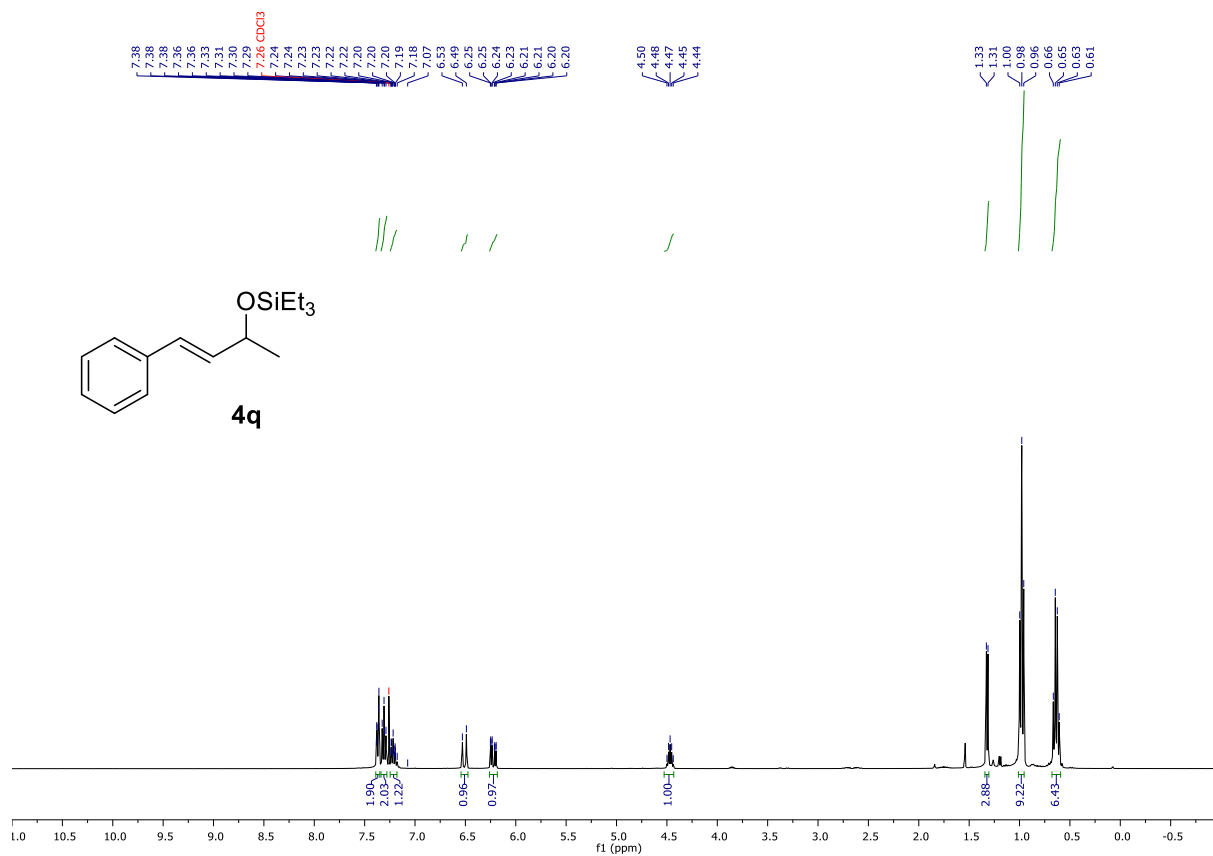

Figure S28. <sup>1</sup>H NMR spectra obtained in CDCl<sub>3</sub> for **4q**.

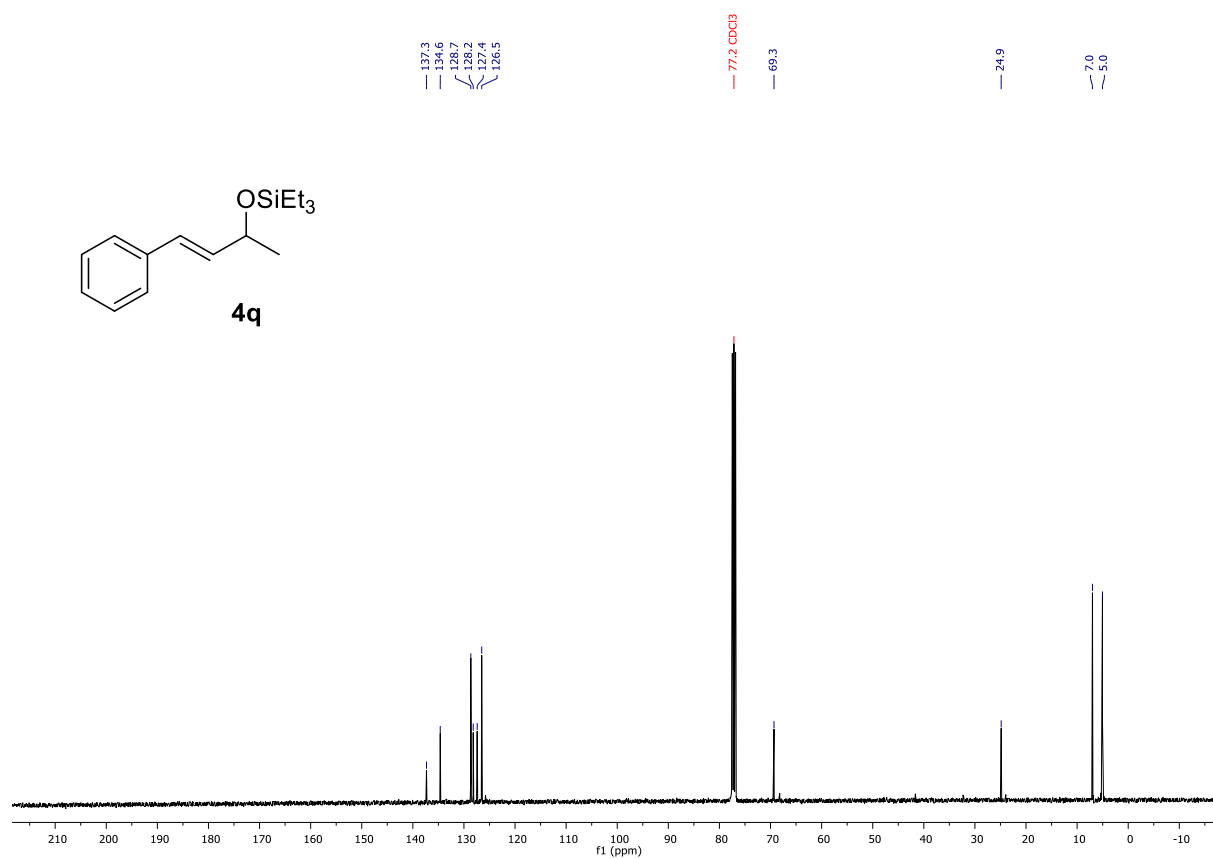

Figure S29. <sup>13</sup>C NMR spectra obtained in CDCl<sub>3</sub> for **4q**.

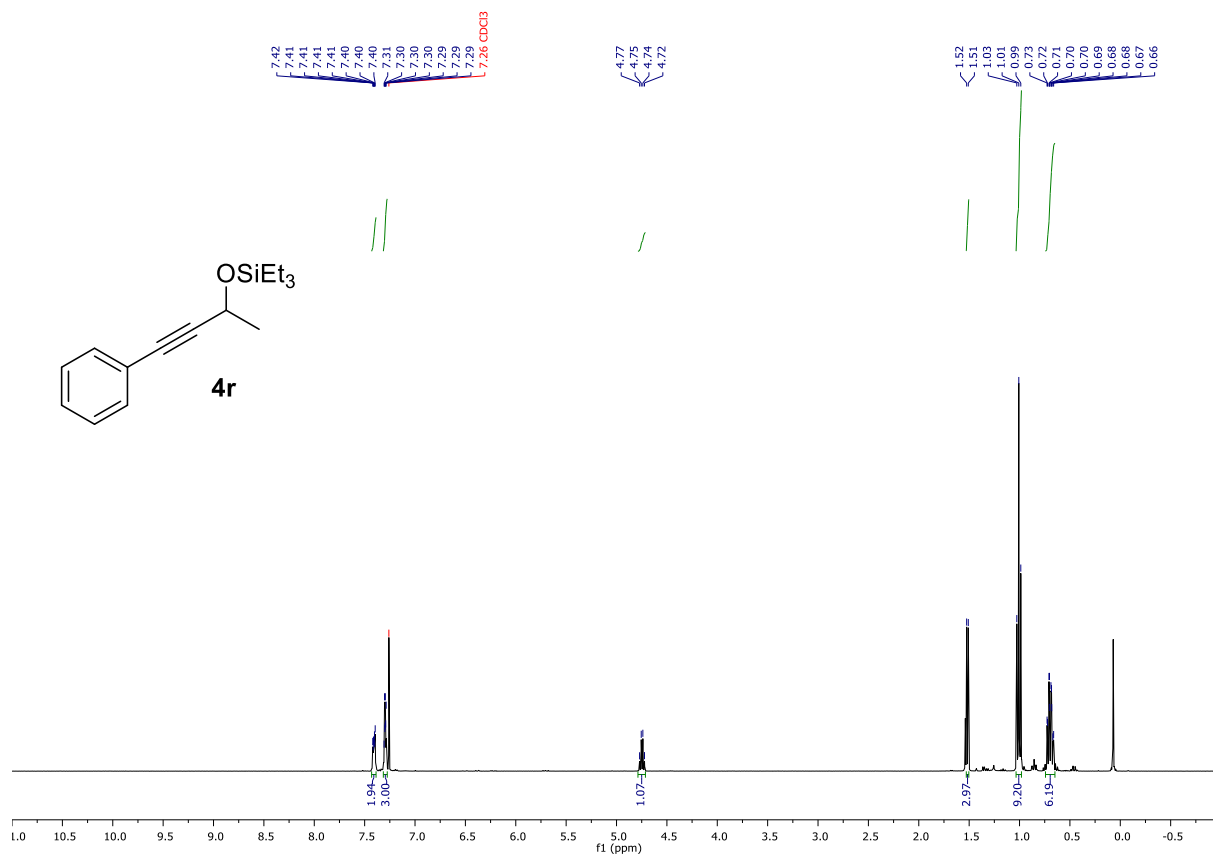

**Figure S30.** <sup>1</sup>H NMR spectra obtained in CDCl<sub>3</sub> for **4r**.

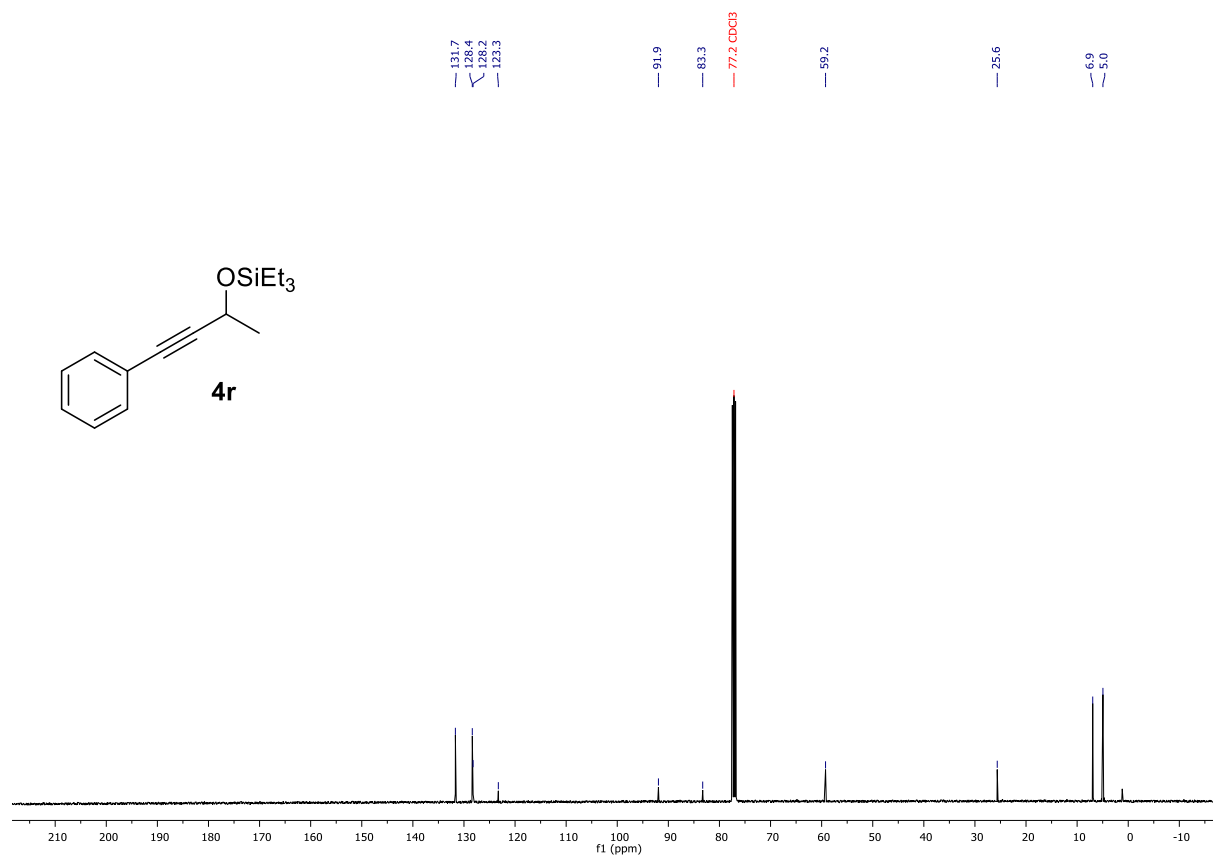

**Figure S31.** <sup>13</sup>C NMR spectra obtained in CDCl<sub>3</sub> for **4r**.

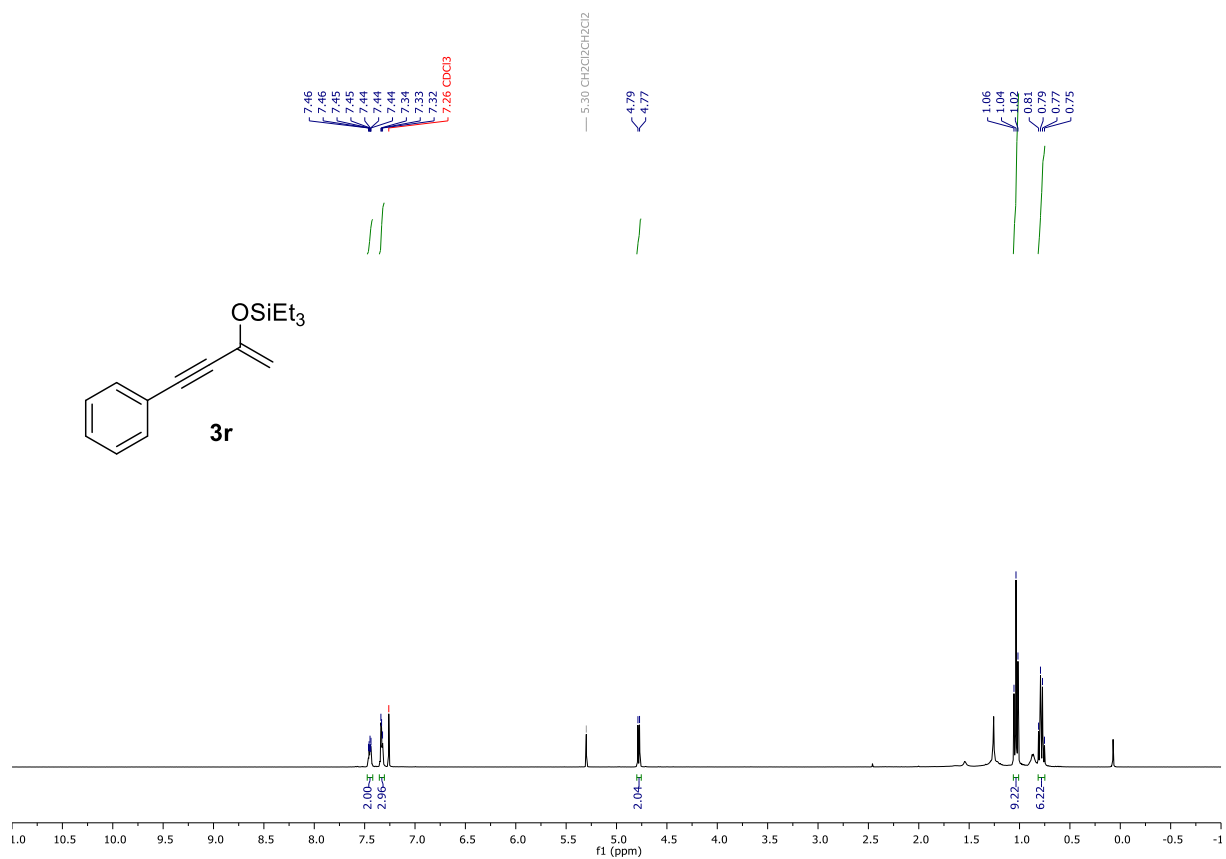

**Figure S32.**  $^1\text{H}$  NMR spectra obtained in  $\text{CDCl}_3$  for enoether byproduct from **3r**.

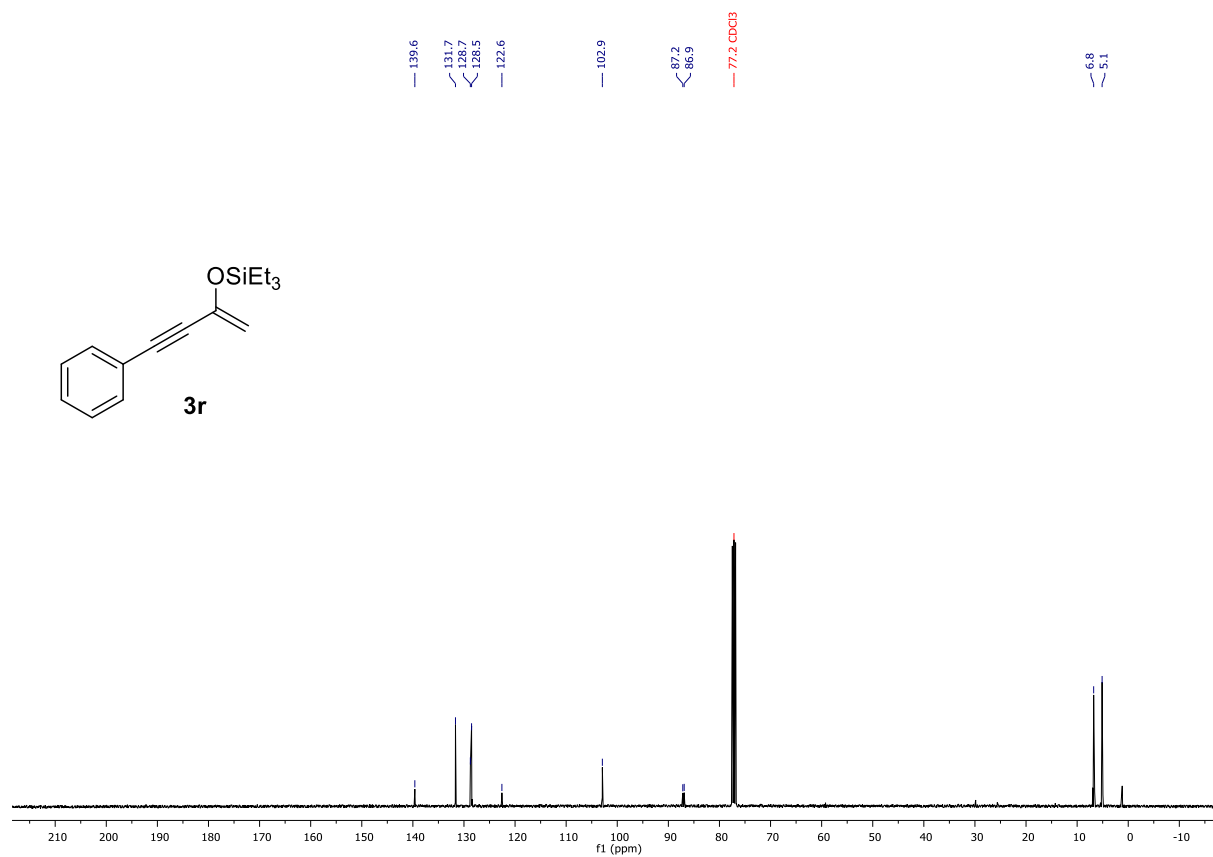

**Figure S33.**  $^{13}\text{C}$  NMR spectra obtained in  $\text{CDCl}_3$  for the enoether byproduct from **3r**.

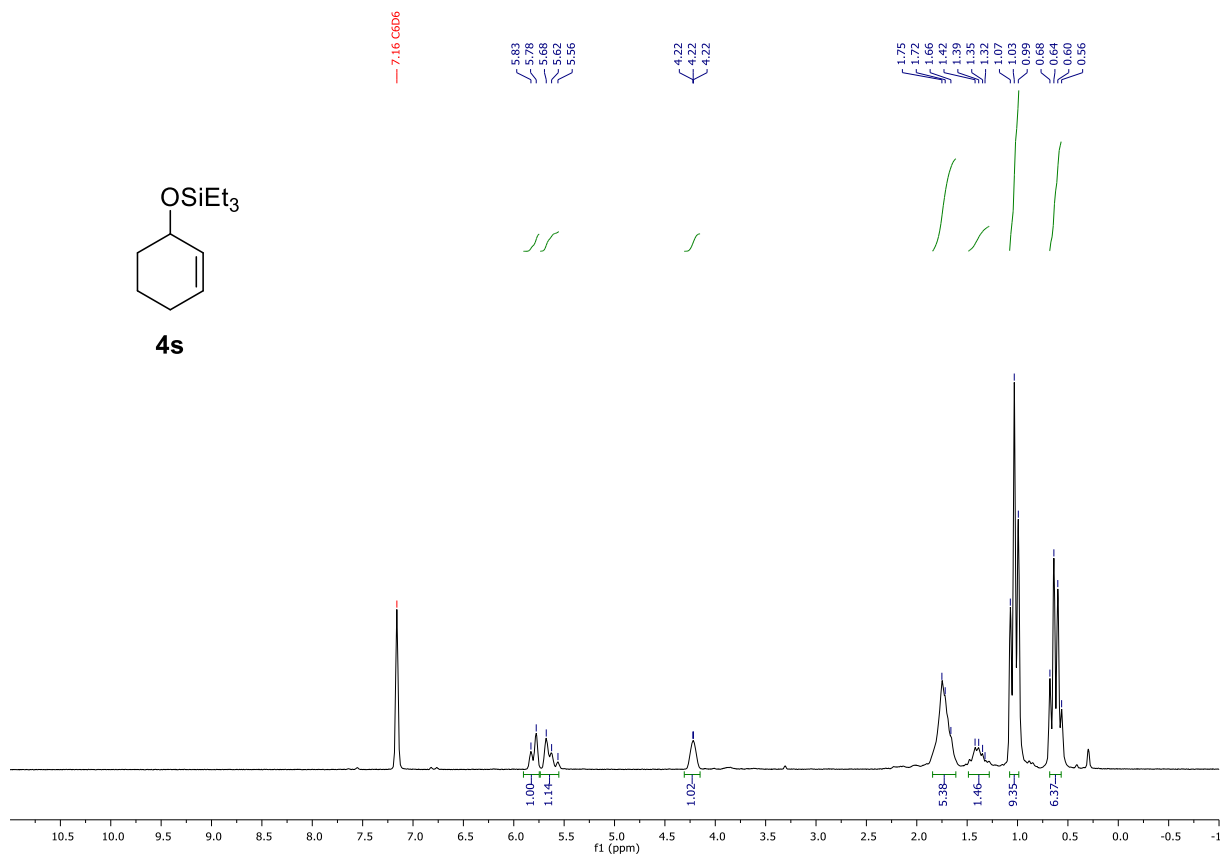

Figure S34.  $^1\text{H}$  NMR spectra obtained in  $\text{C}_6\text{D}_6$  for **4s**.

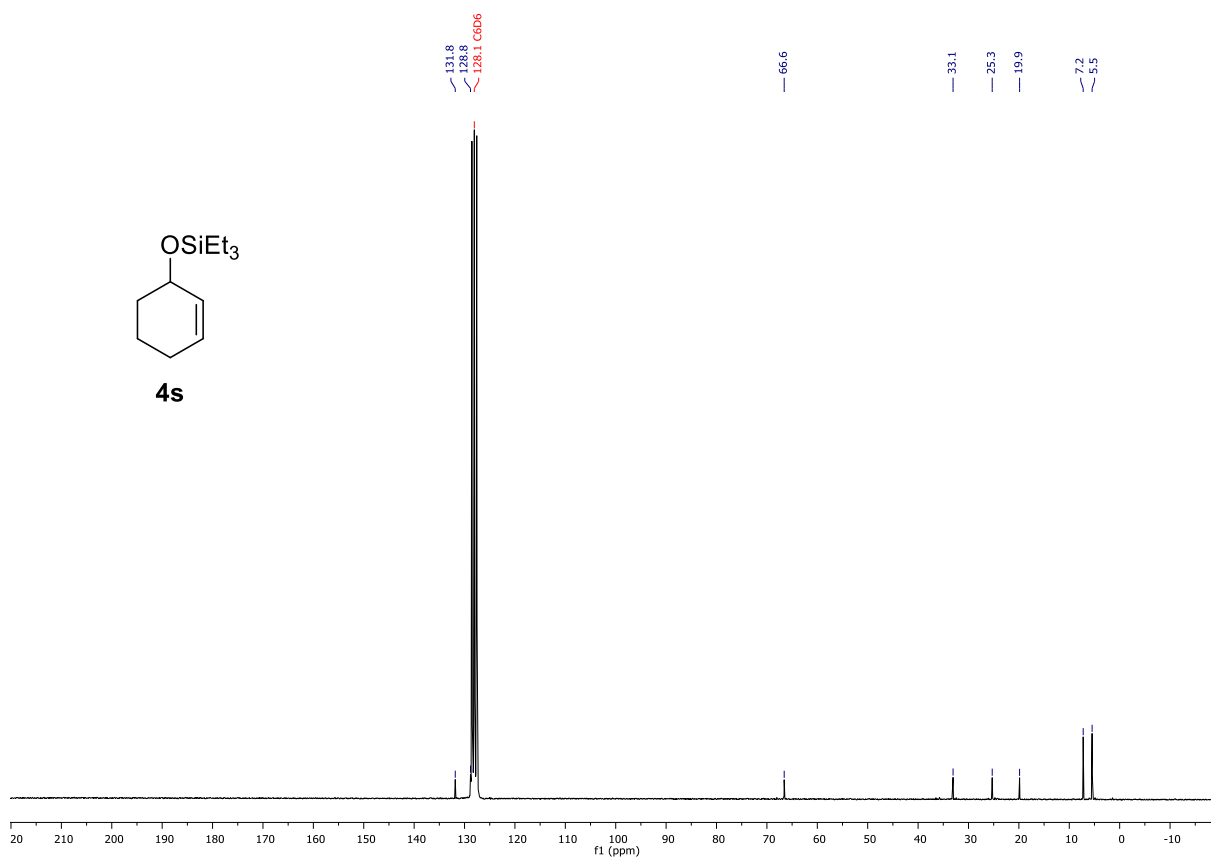

Figure S35.  $^{13}\text{C}$  NMR spectra obtained in  $\text{C}_6\text{D}_6$  for **4s**.

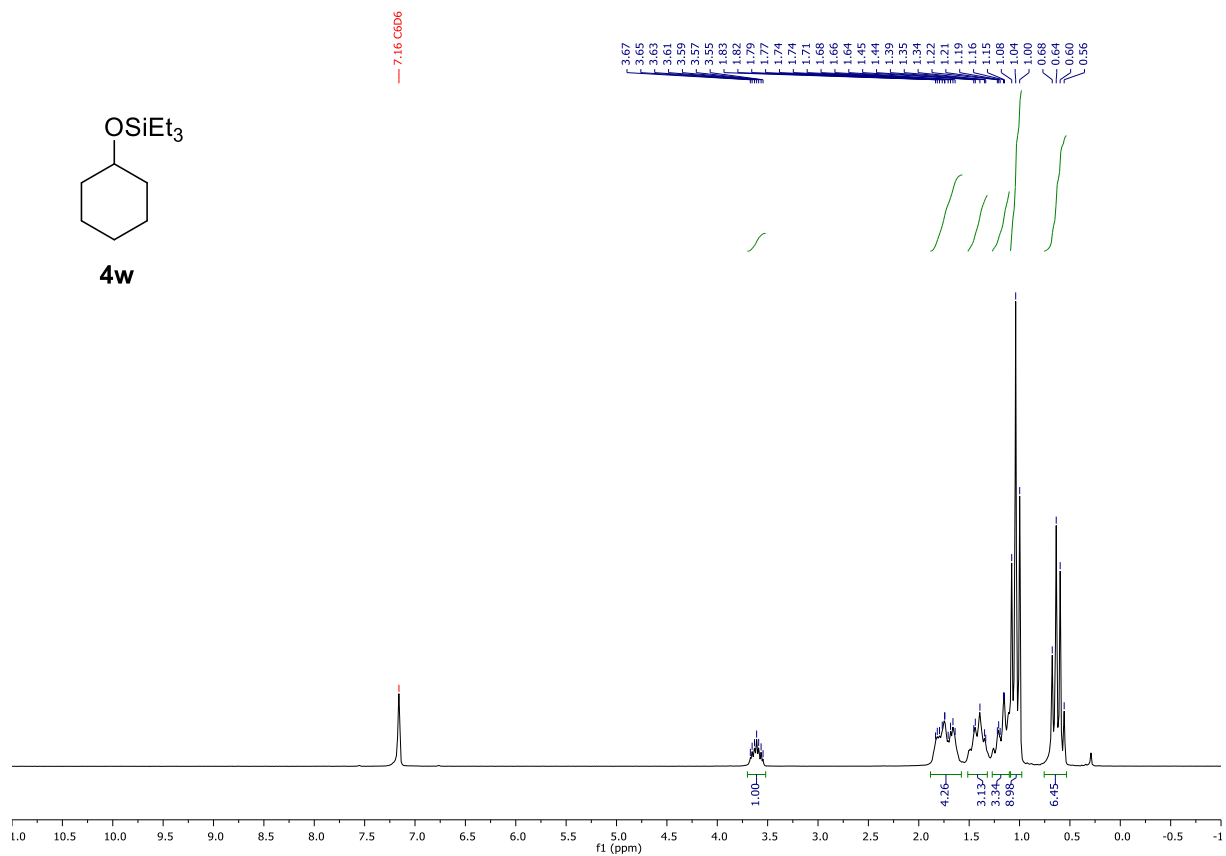

Figure S36. <sup>1</sup>H NMR spectra obtained in C<sub>6</sub>D<sub>6</sub> for **4w**.

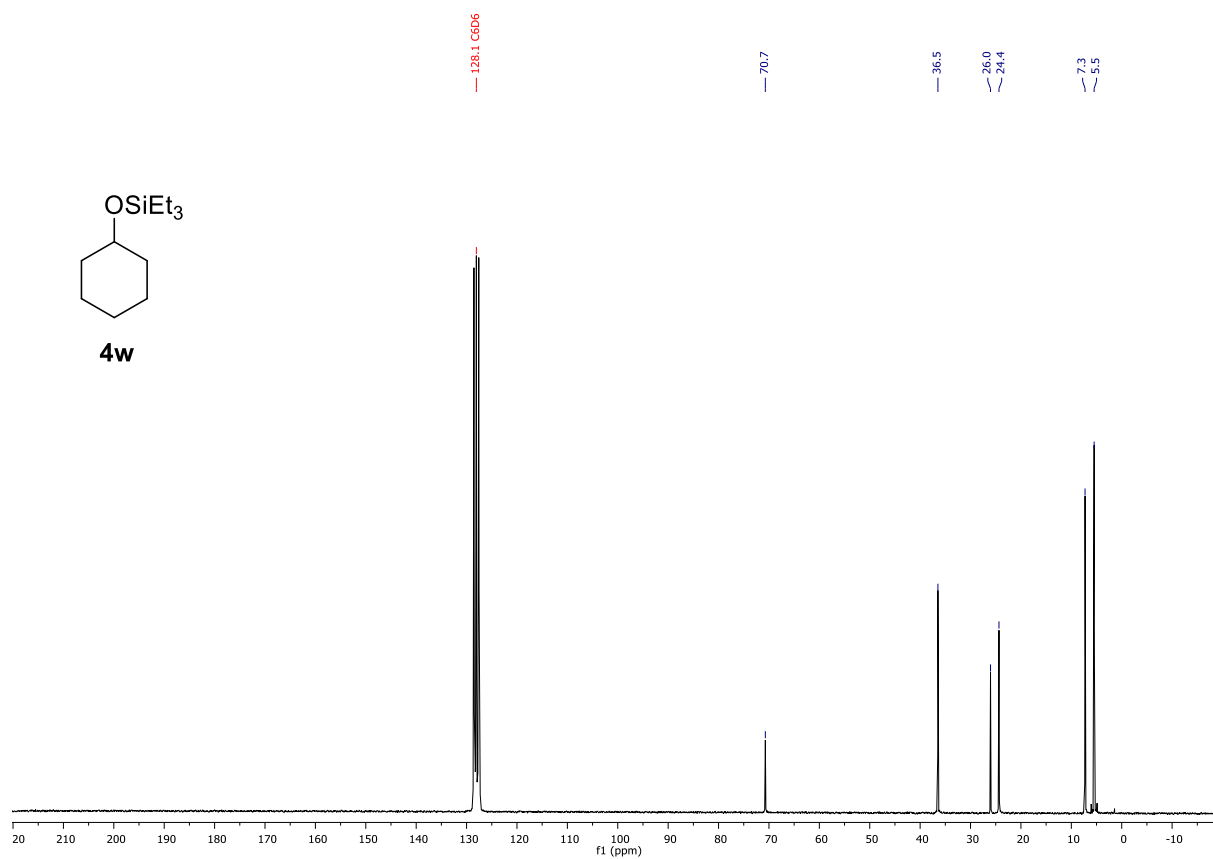

Figure S37. <sup>13</sup>C NMR spectra obtained in C<sub>6</sub>D<sub>6</sub> for **4w**.



### 13. References

- [1] Chauvier, C., Thuéry, P., Cantat, C. *Angew. Chem. Int. Ed.* **2016**, *55*, 14096-14100.
- [2] Chauvier, C., Imberdis, A., Thuéry, P., Cantat, T. *Angew. Chem. Int. Ed.* **2020**, *59*, 14019-14023.
- [3] Godou, T., Chauvier, C., Thuéry, P., Cantat, T. *Synlett* **2017** *28*, 2473-2477.
- [4] Rawat, S., Bhandari, M., Porwal, C. K., Singh, S. *Inorg. Chem.* **2020**, *59*, 7195-7203.
- [5] Rubio, M., Campos, J., Carmona, E. *Org. Lett.* **2011**, *13*, 5236-5239.
- [6] Pérez, M., Qu, Z.-W., Caputo, C. B., Podgorny, V., Hounjet, L. J., Hansen, A., Dobrovetsky, R., Grimme, S., Stephan, D. W. *Chem. Eur. J.* **2015**, *21*, 6491-6500.
- [7] Diez-González, S., Kaur, H., Zinn, F. K., Stevens, E. D., Nolan, S. P. *J. Org. Chem.* **2005**, *70*, 4784-4796.
- [8] Teci, M., Lentz, N., Brenner, E., Matt, D., Toupet, L. *Dalton Trans.* **2015**, *44*, 13991-13998.
- [9] Egbert, J. D., Nolan, S. P. *Chem. Commun.* **2012**, *48*, 2794-2796.
- [10] Kadam, S. T., Kim, S. S. *J. Organomet. Chem.* **2009**, *694*, 2562-2566.
- [11] Ison, E. A., Trivedi, E. R., Corbin, R. A., Abu-Omar, M. M. *J. Am. Chem. Soc.* **2005**, *127*, 15374-15375.
- [12] Du, G., Abu-Omar, M. M. *Organometallics* **2006**, *25*, 4920-4923.
- [13] Tran, B. L., Pink, M., Mindiola, D.J. *Organometallics* **2009**, *28*, 2234-2243.
- [14] Liberman-Martin, A. L., Bergman, R. G., Tilley, T. D. *J. Am. Chem. Soc.* **2015**, *137*, 5328-5331.
- [15] C. Chauvier, T. Godou and T. Cantat, *Chem. Commun.* **2017**, 11697.
